# Supplementary material for: Targeting the Metabolic Paradigms in Cancer and Diabetes
Source: Preprints.org preprint supplement (doi:10.20944/preprints202312.0932.v1), 2023-12-13
Supplement: Supplementary file 2 [file supplementary]

## Sheet: Supplementary Table 1
NCT Number	Study Title	Study Status	Brief Summary	Conditions	Interventions	Sex	Age	Phases	Study Type	Study Design	Start Date	Completion Date
NCT06030622	Phase 2A Pilot C3 Trial of Recurrent/Refractory Metastatic Advanced Pancreatic Cancer	RECRUITING	The goals of this trial are: 1) To evaluate the safety and tolerability of C3 administration with Gemcitabine; and 2) To assess the disease response following C3 administration with Gemcitabine. The main question it aims to answer are: 1) Is C3 in combination with Gemcitabine safe, tolerable, and effective for reducing improving advanced stage pancreatic cancer? and 2) Can C3 in combination with …	Pancreatic Cancer Metastatic	DRUG: C3 (Metformin, Simvastatin, and Digoxin)	ALL	ADULT, OLDER_ADULT	PHASE1|PHASE2	INTERVENTIONAL	Allocation: NA|Intervention Model: SINGLE_GROUP|Masking: NONE|Primary Purpose: OTHER	2023-10-01	2024-09-01
NCT06101147	Effect of Vitamin D Supplementation on Testosterone Level in Women With Polycystic Ovary Syndrome	RECRUITING	The goal of this randomized, double blind, placebo-controlled clinical trial is to learn about, the effect of low dose vitamin D supplementation compares with placebo-controlled group on testosterone level in women with polycystic ovary syndrome. Half of Participants will receive vitamin D and metformin while other half placebo and metformin.	PCOS|Vitamin D	DRUG: Vitamin D3|DRUG: Placebo Oral Tablet	FEMALE	ADULT	PHASE2	INTERVENTIONAL	Allocation: RANDOMIZED|Intervention Model: PARALLEL|Masking: TRIPLE (PARTICIPANT, CARE_PROVIDER, INVESTIGATOR)|Primary Purpose: TREATMENT	2023-09-21	2024-06-30
NCT05023967	Metformin and Nightly Fasting in Women With Early Breast Cancer	RECRUITING	This phase IIb trial studies the combined effect of prolonged nightly fasting and metformin hydrochloride extended release in decreasing breast tumor cell proliferation and other biomarkers of breast cancer. Preventing invasive breast cancer or DCIS. Metformin is widely used to treat type II diabetes and is associated with a decreased risk of cancer and death in diabetic individuals. Intermittent…	Anatomic Stage I Breast Cancer AJCC v8|Anatomic Stage II Breast Cancer AJCC v8|Breast Ductal Carcinoma In Situ|Invasive Breast Carcinoma	PROCEDURE: Biospecimen Collection|DRUG: Extended Release Metformin Hydrochloride|OTHER: Monitoring|OTHER: Nutritional Assessment|OTHER: Short-Term Fasting	FEMALE	ADULT, OLDER_ADULT	PHASE2	INTERVENTIONAL	Allocation: RANDOMIZED|Intervention Model: PARALLEL|Masking: NONE|Primary Purpose: PREVENTION	2023-04-04	2025-11-20
NCT05660083	Alpelisib/iNOS Inhibitor/Nab-paclitaxel in Patients With HER2 Negative Metaplastic Breast Cancer (MpBC)	RECRUITING	This is a research study to test the safety and effectiveness of using the drug alpelisib together with chemotherapy (nab-paclitaxel) and a drug called L-NMMA in patients with HER2 negative metastatic or locally advanced metaplastic breast cancer, who have not responded to previous treatments. Participants in this study in addition to the standard care chemotherapy will also receive the drug alpe…	HER2-negative Breast Cancer|Metastatic Breast Cancer|Metaplastic Breast Carcinoma|TNBC - Triple-Negative Breast Cancer	DRUG: L-NMMA	ALL	ADULT, OLDER_ADULT	PHASE2	INTERVENTIONAL	Allocation: NA|Intervention Model: SINGLE_GROUP|Masking: NONE|Primary Purpose: TREATMENT	2023-01-12	2028-12-02
NCT05237960	Metformin for the Prevention of Oral Cancer in Patients With Oral Leukoplakia or Erythroplakia	RECRUITING	This phase IIb trial tests whether metformin works in preventing oral cancer in patients with oral leukoplakia (white patches) or erythroplakia (red patches). Metformin is in a class of drugs called biguanides. Metformin helps to control the amount of glucose (sugar) in the blood. It decreases the amount of glucose patients absorb from food and the amount of glucose made by the liver. Metformin a…	Erythroplakia|Oral Leukoplakia	PROCEDURE: Biopsy|PROCEDURE: Biospecimen Collection|DRUG: Extended Release Metformin Hydrochloride|DRUG: Placebo Administration	ALL	ADULT, OLDER_ADULT	PHASE2	INTERVENTIONAL	Allocation: RANDOMIZED|Intervention Model: PARALLEL|Masking: DOUBLE (PARTICIPANT, INVESTIGATOR)|Primary Purpose: PREVENTION	2022-11-28	2026-07-31
NCT05981742	Effects of Combined Metformin and Cabergoline in Comparison With Metformin Only Therapy on Ovarian and Hormonal Activities in Iraqi Patients With PCOS	COMPLETED	The goal of this interventional Randomized clinical is to compare the effect of Metformin alone, Cabergoline alone and Metformin and Cabergoline in combination in a sample of Iraqi female patients with polycystic ovary syndrome. The main questions to answer are: 1. What are the effects of the tested regimens on Body mass index (BMI)? 2. What are the effects of the tested regimens on hormonal stat…	Polycystic Ovary Syndrome	DRUG: Metformin Hydrochloride 500 MG|DRUG: Cabergoline 0.5 MG|DRUG: Metformin Hydrochloride 500 MG + Cabergoline 0.5 MG	FEMALE	ADULT	PHASE2	INTERVENTIONAL	Allocation: RANDOMIZED|Intervention Model: PARALLEL|Masking: NONE|Primary Purpose: TREATMENT	2022-09-21	2023-03-31
NCT05279768	Stem Cells and Secretomes for Infertility Therapy in Polycystic Ovary Syndrome (PCOS) Patients With Insulin Resistance.	RECRUITING	The purpose of this study is to investigating the effect of Umbilical Cord Mesenchymal Stem Cell (UC-MSCs) and secretomes to insulin resistance in Polycystic Ovary Syndrome (PCOS) patients. This study has 4 arms namely UC-MSCs treatment, secretomes treatment, UC-MSCs and secretomes treatment, and control.	Polycystic Ovary Syndrome	BIOLOGICAL: UC-MSCs|BIOLOGICAL: Secretomes|BIOLOGICAL: UC-MSCs and Secretomes|BIOLOGICAL: Control	FEMALE	ADULT	PHASE1|PHASE2	INTERVENTIONAL	Allocation: RANDOMIZED|Intervention Model: PARALLEL|Masking: SINGLE (CARE_PROVIDER)|Primary Purpose: TREATMENT	2022-09-01	2023-12-01
NCT05316935	GnRHa + Letrozole in Progestin-insensitive Endometrial Cancer and Atypical Hyperplasia Patients	RECRUITING	To investigate the efficacy of GnRHa plus letrozole vs Diane-35 plus metformin in non-obese progestin-insensitive early-stage endometrial cancer (EEC) and atypical hyperplasia(EAH) patients asking for conservative treatment. To investigate the efficacy of GnRHa plus letrozole in obese progestin-insensitive EEC and EAH patients.	Endometrial Neoplasms|Atypical Endometrial Hyperplasia|Progesterone Resistance	DRUG: GnRHa|DRUG: Letrozole 2.5mg|DRUG: Diane-35|DRUG: MET	FEMALE	ADULT	PHASE2|PHASE3	INTERVENTIONAL	Allocation: NON_RANDOMIZED|Intervention Model: PARALLEL|Masking: NONE|Primary Purpose: TREATMENT	2022-07-13	2025-03-30
NCT05230758	Effect of Metformin on Behaviour and the Brain in Children Treated for a Brain Tumour	RECRUITING	The efficacy of treatment with metformin for promoting cognitive recovery and brain growth in children/adolescents treated for medulloblastoma will be investigated in a multi-site Phase III randomized double-blind placebo-controlled parallel arm superiority trial. Specifically, in children/adolescents aged 7 years to 17 years and 11 months who have completed treatment for medulloblastoma, is oral…	Medulloblastoma, Childhood|Cognitive Impairment	DRUG: Metformin hydrochloride (HCl) 500mg tablet|DRUG: Placebo	ALL	CHILD	PHASE3	INTERVENTIONAL	Allocation: RANDOMIZED|Intervention Model: PARALLEL|Masking: QUADRUPLE (PARTICIPANT, CARE_PROVIDER, INVESTIGATOR, OUTCOMES_ASSESSOR)|Primary Purpose: SUPPORTIVE_CARE	2022-07-01	2027-06-30
NCT05394142	A Clinical Trial to Evaluate the Efficacy, Tolerability, and Safety of a Fixed Dose Combination of Spironolactone, Pioglitazone & Metformin (SPIOMET) in Polycystic Ovary Syndrome (PCOS)	RECRUITING	This is a multi-centre, multi-national, double-blinded, placebo-controlled, parallel, randomised Phase II clinical trial to evaluate the efficacy, tolerability, and safety of a fixed dose combination of Spironolactone, Pioglitazone and Metformin (SPIOMET) for adolescent girls and young adult women with polycystic ovary syndrome. Study description: Currently, there is no European Medicines Agency …	Polycystic Ovary Syndrome (PCOS)	DRUG: Placebo|DRUG: Pioglitazone|DRUG: Spironolactone|DRUG: Metformin	FEMALE	CHILD, ADULT	PHASE2	INTERVENTIONAL	Allocation: RANDOMIZED|Intervention Model: PARALLEL|Masking: QUADRUPLE (PARTICIPANT, CARE_PROVIDER, INVESTIGATOR, OUTCOMES_ASSESSOR)|Primary Purpose: TREATMENT	2022-05-24	2025-04-01
NCT05351021	Efficacy of Metformin as Preventive Treatment in Paclitaxel Induced Peripheral Neuropathy in Breast Cancer Patients	COMPLETED	At present, there are no FDA-approved treatments for chemotherapy-induced neuropathy. Discrete neuro anti-inflammatory effects of metformin support its repurposing as a neuroprotective agent in patients with neurodegenerative diseases. Therefore, this study aims to evaluate the effect of metformin on the amelioration of paclitaxel induced neuropathy in cancer patients.	Peripheral Neuropathy|Breast Cancer	DRUG: Metformin|DRUG: Placebo	FEMALE	ADULT, OLDER_ADULT	PHASE2	INTERVENTIONAL	Allocation: RANDOMIZED|Intervention Model: PARALLEL|Masking: DOUBLE (PARTICIPANT, OUTCOMES_ASSESSOR)|Primary Purpose: PREVENTION	2022-04-12	2022-10-30
NCT04931017	Metformin for Chemoprevention of Lung Cancer in Overweight or Obese Individuals at High Risk for Lung Cancer	RECRUITING	This phase II trial determines the effect of metformin extended release on the risk for developing lung cancer in overweight/obese patients that are at high-risk for developing lung cancer. Metformin is widely used to treat type II diabetes and has a long history of safety and minimal side effects. At similar dosage, the drug may have potential anti-cancer activity. Metformin use has been associa…	Lung Carcinoma	PROCEDURE: Biopsy|PROCEDURE: Biospecimen Collection|PROCEDURE: Bronchoscopy|DRUG: Extended Release Metformin Hydrochloride|OTHER: Questionnaire Administration	ALL	ADULT, OLDER_ADULT	PHASE2	INTERVENTIONAL	Allocation: RANDOMIZED|Intervention Model: CROSSOVER|Masking: NONE|Primary Purpose: PREVENTION	2022-03-18	2025-04-01
NCT05036226	COAST Therapy in Advanced Solid Tumors and Prostate Cancer	RECRUITING	The purpose of this Phase I/II study is to determine the safety and effectiveness of up to 5 study drugs used together for the treatment of solid tumor cancers. The drugs are hydroxychloroquine, nelfinavir, metformin, dasatinib and sirolimus.	Prostate Cancer Recurrent|Solid Tumor, Adult	COMBINATION_PRODUCT: Hydroxychloroquine, Metformin, Sirolimus|COMBINATION_PRODUCT: Hydroxychloroquine, Metformin, Sirolimus, Dasatanib|COMBINATION_PRODUCT: Hydroxychloroquine, Metformin, Sirolimus, Nelfinavir|COMBINATION_PRODUCT: Hydroxychloroquine, Metformin, Sirolimus, Nelfinavir, Dasatinib|COMBINATION_PRODUCT: Hydroxychloroquine, Metformin, Sirolimus, Nelfinavir|COMBINATION_PRODUCT: Hydroxychl…	ALL	ADULT, OLDER_ADULT	PHASE1|PHASE2	INTERVENTIONAL	Allocation: RANDOMIZED|Intervention Model: SEQUENTIAL|Masking: NONE|Primary Purpose: TREATMENT	2022-03-03	2025-10-15
NCT04742751	An Open-Label Pilot Intervention Trial to Prevent Diabetes in Prediabetic Adult Survivors of Childhood Cancer	RECRUITING	This is a first-in survivor, single-arm pilot study with the goal of establishing evidence of feasibility and safety of a combined pharmacologic (metformin) and lifestyle intervention (using an existing digital platform) to prevent diabetes in prediabetic adult survivors of childhood cancer. Primary Objective The primary aim of this proposal is to establish the feasibility and safety of a 24-week…	PreDiabetes|Adult Children	DRUG: Metformin|BEHAVIORAL: Digital Intervention	ALL	ADULT	PHASE2	INTERVENTIONAL	Allocation: NA|Intervention Model: SINGLE_GROUP|Masking: NONE|Primary Purpose: TREATMENT	2022-03-02	2025-03-01
NCT05183204	Paxalisib With a High Fat, Low Carb Diet and Metformin for Glioblastoma	RECRUITING	This study is for patients with newly diagnosed glioblastoma, as well as patients who have recurring glioblastoma. Subjects will be given daily paxalisib and metformin while also maintaining a ketogenic diet. The purpose of this study is to assess the safety of Paxalisib while maintaining a ketogenic diet (a high fat, low carbohydrate diet) and Metformin (a drug approved by the Food and Drug Admi…	Glioblastoma	DRUG: Paxalisib|DRUG: Metformin|OTHER: Ketogenic Diet	ALL	ADULT, OLDER_ADULT	PHASE2	INTERVENTIONAL	Allocation: NON_RANDOMIZED|Intervention Model: SINGLE_GROUP|Masking: NONE|Primary Purpose: TREATMENT	2022-02-14	2025-12-01
NCT04741945	Repurposing Metformin as a Leukemia-preventive Drug in CCUS and LR-MDS	RECRUITING	This is a single-arm pilot study of the feasibility and safety of metformin in patients with clonal cytopenia of undetermined significance (CCUS) or lower-risk myelodysplastic neoplasms (LR-MDS).	Preleukemia|Myelodysplastic Neoplasm|Cytopenia|Preleukemic Anemia	DRUG: Metformin	ALL	ADULT, OLDER_ADULT	PHASE2	INTERVENTIONAL	Allocation: NA|Intervention Model: SINGLE_GROUP|Masking: NONE|Primary Purpose: OTHER	2021-12-13	2026-06-01
NCT04576104	Megestrol Acetate Compared With Megestrol Acetate and Metformin to Prevent Endometrial Cancer	RECRUITING	This phase II trial studies the effect of megestrol acetate alone or in combination with metformin in preventing the progression of uterine pre-cancer (endometrial intraepithelial neoplasia) to endometrial cancer. Megestrol acetate is a drug used to block estrogen and suppress the effects of estrogen and androgens. It is the current non-surgical treatment of endometrial intraepithelial neoplasia.…	Endometrial Atypical Hyperplasia/Endometrioid Intraepithelial Neoplasia|Endometrial Carcinoma	PROCEDURE: Biopsy|DRUG: Extended Release Metformin Hydrochloride|DRUG: Megestrol Acetate|OTHER: Questionnaire Administration	ALL	ADULT, OLDER_ADULT	PHASE2	INTERVENTIONAL	Allocation: RANDOMIZED|Intervention Model: PARALLEL|Masking: NONE|Primary Purpose: PREVENTION	2021-09-17	2024-05-31
NCT05445791	Metformin Plus Tyrosine Kinase Inhibitors for Treatment of Patients With Non-small Cell Lung Cancer With EGFR Mutations	RECRUITING	Lung cancer represents the most frequent neoplastic disease worldwide, with an annual incidence of over 2 million cases, which represents 11.6% of all cancer diagnoses. Further, it constitutes the main cause of cancer-related deaths. Among the lung cancer types, non-small cell lung cancer represents 80-85% of cases, and the majority of patients are diagnosed with locally advanced or metastatic di…	Non Small Cell Lung Cancer	DRUG: Metformin Hydrochloride|OTHER: Placebo	ALL	ADULT, OLDER_ADULT	PHASE3	INTERVENTIONAL	Allocation: RANDOMIZED|Intervention Model: PARALLEL|Masking: TRIPLE (PARTICIPANT, CARE_PROVIDER, INVESTIGATOR)|Primary Purpose: TREATMENT	2021-07-15	2025-07-14
NCT04792749	Clinical Effects of Metformin on Fertility-sparing Treatment for Early Endometrial Cancer	RECRUITING	The purpose of the study is to investigate the effects of metformin in addition to the conventional progestin therapy in the fertility-sparing treatment of early stage endometrial cancer.	Endometrial Cancer Stage I	DRUG: Metformin	FEMALE	ADULT	PHASE3	INTERVENTIONAL	Allocation: NON_RANDOMIZED|Intervention Model: SEQUENTIAL|Masking: NONE|Primary Purpose: TREATMENT	2021-06-01	2024-03-31
NCT04867252	Effects of Combined Resveratrol and Myo-inositol on Altered Metabolic, Endocrine Parameters and Perceived Stress in Patients With Polycystic Ovarian Syndrome	COMPLETED	The investigators aim is to conduct a double blind randomized clinical trial, to study the effects of combined Resveratrol and Myo-Inositol on altered metabolic, endocrine parameters and perceived stress response in patients with Polycystic Ovary Syndrome (PCOS). Women diagnosed with PCOS, using criteria proposed in November 2015, by the American Association of Clinical Endocrinologists (AACE), A…	PCOS	DRUG: Resveratrol (1000mg twice a day), Myoinositol 1000mg (Twice a day)|DRUG: Metformin (500 mg Twice a day), Pioglitazone (15 mg Twice a day)	FEMALE	ADULT	PHASE2	INTERVENTIONAL	Allocation: RANDOMIZED|Intervention Model: PARALLEL|Masking: TRIPLE (PARTICIPANT, CARE_PROVIDER, OUTCOMES_ASSESSOR)|Primary Purpose: TREATMENT	2021-05-03	2021-08-03
NCT04850846	Investigation of Metformin for the Prevention of Progression of Precursor Multiple Myeloma	RECRUITING	The purpose of this research is to understand whether the drug metformin could be used in the future to help prevent patients with monoclonal gammopathy of undetermined significance (MGUS) and smoldering multiple myeloma (SMM) from developing multiple myeloma. The names of the study drug involved in this study is: * Metformin, extended release * Placebo ( a pill that has no active ingredients)	Monoclonal Gammopathy of Undetermined Significance|Smoldering Multiple Myeloma	DRUG: Metformin XR|OTHER: Placebo	ALL	ADULT, OLDER_ADULT	PHASE2	INTERVENTIONAL	Allocation: RANDOMIZED|Intervention Model: PARALLEL|Masking: QUADRUPLE (PARTICIPANT, CARE_PROVIDER, INVESTIGATOR, OUTCOMES_ASSESSOR)|Primary Purpose: TREATMENT	2021-04-27	2025-01-31
NCT04973891	CANA/Met in Non-diabetic Women With PCOS	COMPLETED	Polycystic ovary syndrome (PCOS), which is associated with hyperinsulinaemia, hyperandrogenaemia, impaired glucose metabolism and aberrant adipokines production from the adipose tissue, is a heterogeneous reproductive and endocrine disorder.Currently, metformin, a classical and common insulin sensitizer that can reduce both hyperinsulinemia and hyperandrogenemia, is widely used for patients with …	Polycystic Ovary Syndrome	DRUG: Canagliflozin combined with metformin|DRUG: metformin	FEMALE	ADULT	PHASE1|PHASE2	INTERVENTIONAL	Allocation: RANDOMIZED|Intervention Model: PARALLEL|Masking: NONE|Primary Purpose: TREATMENT	2021-04-07	2022-03-08
NCT04758000	Metformin as Maintenance Therapy in Patients With Bone Sarcoma and High Risk of Relapse	RECRUITING	Primitive bone sarcoma are rare tumors with low options of therapy for patient treatment. 1. OSTEOSARCOMA VERY POOR RESPONDER COHORT. Necrosis on primitive localized osteosarcoma represents one of the principal prognostic factors. Nowadays, for localized osteosarcoma there is no maintenance therapy that have shown to be effective. In ISG-OS1 study in patients with necrosis \< 60% had an event fre…	Osteosarcoma|Ewing Sarcoma	DRUG: Metformin Hydrochloride	ALL	CHILD, ADULT, OLDER_ADULT	PHASE2	INTERVENTIONAL	Allocation: NA|Intervention Model: SINGLE_GROUP|Masking: NONE|Primary Purpose: PREVENTION	2021-03-01	2027-07-01
NCT04536805	Relapse in Previously Irradiated Prostate Bed : Stereotactic Ablative Reirradiation Potentiated by Metformin	RECRUITING	This phase I/II escalation dose study is assessing the efficacy of the recommended dose of stereotactic re-irradiation (SBRT) of relapses within the prostatectomy bed, potentiated by metformin	Prostate Cancer	DRUG: Metformin|RADIATION: Stereotactic Body Radiation Therapy (SBRT) 30 Gray (Gy)|RADIATION: Stereotactic Body Radiation Therapy (SBRT) 36 Gy|RADIATION: Stereotactic Body Radiation Therapy (SBRT) 25 Gy	MALE	ADULT, OLDER_ADULT	PHASE1|PHASE2	INTERVENTIONAL	Allocation: NON_RANDOMIZED|Intervention Model: SEQUENTIAL|Masking: NONE|Primary Purpose: TREATMENT	2020-11-17	2028-11-01
NCT04300790	Study to Evaluate the Effect of Metformin in the Prevention of HG in HR[+]/HER2[-] PIK3CA-mut Advanced BC Patients	ACTIVE_NOT_RECRUITING	Men and post- or induced menopausal women with ER\[+\] and/or PgR\[+\], HER2\[- \] advanced BC, with centrally-confirmed PI3KCAMut who progressed to an aromatase inhibitor (AI) regimen.	Breast Cancer	DRUG: Alpelisib|DRUG: Metformin|DRUG: Fulvestrant|DRUG: Letrozole|DRUG: Exemestane	ALL	ADULT, OLDER_ADULT	PHASE2	INTERVENTIONAL	Allocation: RANDOMIZED|Intervention Model: SINGLE_GROUP|Masking: NONE|Primary Purpose: TREATMENT	2020-10-23	2024-07-31
NCT04114136	Anti-PD-1 mAb Plus Metabolic Modulator in Solid Tumor Malignancies	RECRUITING	Patients with histologically or cytologically confirmed advanced melanoma, renal cell carcinoma, NSCLC, HCC (Child Pugh Class A only), MSI-High solid tumors, Urothelial Cancer, GE junction/Gastric Adenocarcinoma, or HNSCC for which current standard of care treatment for their stage of disease would be with Pembrolizumab or Nivolumab monotherapy, who meet eligibility criteria will undergo a biopsy…	Melanoma|NSCLC|Hepatocellular Carcinoma|Urothelial Cancer|Gastric Adenocarcinoma|HNSCC|Esophageal Adenocarcinoma|Microsatellite Instability-High Solid Malignant Tumor	DRUG: Nivolumab or Pembrolizumab (dependent upon approved indication)|DRUG: Metformin|DRUG: Rosiglitazone	ALL	ADULT, OLDER_ADULT	PHASE2	INTERVENTIONAL	Allocation: RANDOMIZED|Intervention Model: PARALLEL|Masking: NONE|Primary Purpose: TREATMENT	2020-09-14	1932-04-30
NCT04414540	Combining Pembrolizumab and Metformin in Metastatic Head and Neck Cancer Patients	RECRUITING	The purpose of this study is to determine anti-tumor activity by measuring overall response rate in recurrent and/or metastatic HNSCC patients receiving the combination of metformin and pembrolizumab.	Head and Neck Squamous Cell Carcinoma	DRUG: Metformin Extended Release Oral Tablet|DRUG: Pembrolizumab	ALL	ADULT, OLDER_ADULT	PHASE2	INTERVENTIONAL	Allocation: RANDOMIZED|Intervention Model: PARALLEL|Masking: NONE|Primary Purpose: TREATMENT	2020-08-31	2024-07-01
NCT04207944	The Prevention of Progression to Pancreatic Cancer Trial (The 3P-C Trial)	RECRUITING	This is a multi-center randomized double-blind placebo controlled trial of patients with high-risk intraductal papillary mucinous neoplasms (IPMNs) of the pancreas. The primary objective is to evaluate the effect of sulindac on the presence or absence of progression of IPMN after up to 3 years of treatment. Patients without contraindications will be considered to be eligible and will be required …	IPMN|IPMN, Pancreatic	DRUG: Sulindac 400 MG|OTHER: Placebo	ALL	ADULT, OLDER_ADULT	PHASE2	INTERVENTIONAL	Allocation: RANDOMIZED|Intervention Model: PARALLEL|Masking: TRIPLE (PARTICIPANT, CARE_PROVIDER, INVESTIGATOR)|Primary Purpose: PREVENTION	2020-07-10	2027-08-31
NCT04033107	High Dose Vitamin C Combined With Metformin in the Treatment of Malignant Tumors	RECRUITING	This is an open, prospective, single-arm, multi-cohort clinical study to evaluate the efficacy and safety of high-dose vitamin C combined with metformin in the treatment of malignant tumors.	Hepatocellular Cancer|Pancreatic Cancer|Gastric Cancer|Colorectal Cancer	DRUG: Vitamin C|DRUG: Metformin	ALL	ADULT, OLDER_ADULT	PHASE2	INTERVENTIONAL	Allocation: NA|Intervention Model: SINGLE_GROUP|Masking: NONE|Primary Purpose: TREATMENT	2020-07-01	2024-12-01
NCT04275713	Altered Tumor Oxygenation by Metformin, a Potential Step in Overcoming Radiotherapy Resistance in LACC	RECRUITING	Poor tumor oxygenation (hypoxia) is an established negative prognostic and predictive factor in locally advanced cervical cancer (LACC). Hypoxia-modifying measures implemented in the clinic are lacking. Metformin is a well-known, well-tolerated and low-cost drug used for decades in the treatment of type 2- diabetes. Recent studies suggest an improved tumor oxygenation by metformin potentially imp…	Cervical Cancer	DRUG: Metformin|DRUG: Cisplatin	FEMALE	ADULT, OLDER_ADULT	PHASE2	INTERVENTIONAL	Allocation: RANDOMIZED|Intervention Model: PARALLEL|Masking: NONE|Primary Purpose: TREATMENT	2020-05-22	2025-09-01
NCT04248998	Calorie Restriction With or Without Metformin in Triple Negative Breast Cancer	ACTIVE_NOT_RECRUITING	Glucose starvation and metformin have synergistic antitumor effects that are mediated through the concomitant inhibition of glycolysis and mitochondrial oxidative phosphorylation. The BREAKFAST trial will evaluate the antitumor activity of combining cyclic fasting-mimicking diet (FMD), which reproduces the in vitro effects of glucose starvation, plus/minus metformin with standard preperative anth…	Triple-negative Breast Cancer	DIETARY_SUPPLEMENT: Fasting-mimicking diet|DRUG: Metformin|DRUG: Preoperative chemotherapy	FEMALE	ADULT, OLDER_ADULT	PHASE2	INTERVENTIONAL	Allocation: RANDOMIZED|Intervention Model: PARALLEL|Masking: NONE|Primary Purpose: TREATMENT	2020-05-05	2024-05-01
NCT05921942	The Impact of Metformin Administration on the Clinical Outcome of Stage IV Colon Cancer	RECRUITING	Design: Prospective, randomized controlled trial Setting: Clinical Oncology and Nuclear Medicine, Ain Shams University Condition: Colorectal cancer Patients will be randomized into one of two groups: Group A: Patients will receive standard therapy FOLFOX PROTOCOL Group B: Patients will receive metformin (500 mg twice daily or 1000 mg once daily) on top of standard therapy Assessment: Baseline Ass…	Colorectal Cancer	DRUG: Metformin	ALL	ADULT, OLDER_ADULT	PHASE3	INTERVENTIONAL	Allocation: RANDOMIZED|Intervention Model: PARALLEL|Masking: NONE|Primary Purpose: PREVENTION	2020-04-15	2023-09-06
NCT04170465	Role of Adding Metformin to Neoadjuvant Chemotherapy in Patients With Breast Cancer (METNEO)	COMPLETED	Metformin, the widely prescribed oral hypoglycemic drug, is well known for its established efficacy, favorable safety profile, and low cost. Metformin has recently received increasing attention because of its potential antitumorigenic effects that are thought to be independent of its hypoglycemic effects. It has been extensively studied in preclinical models, which have implicated several molecul…	Breast Cancer Female	DRUG: Metformin Hydrochloride 850 mg Tablets|DRUG: AC-T chemotherapy regimen	FEMALE	ADULT, OLDER_ADULT	PHASE2	INTERVENTIONAL	Allocation: RANDOMIZED|Intervention Model: PARALLEL|Masking: NONE|Primary Purpose: TREATMENT	2019-10-29	2022-06-28
NCT04143282	Evaluation of the Effect of Metformin on Metastatic Breast Cancer as Adjuvant Treatment	COMPLETED	This study aims to determine the effect of metformin along with standard cancer treatment, and its effect on the prognosis of the metastatic breast in non-diabetic patients.	Metastatic Breast Cancer	DRUG: Metformin plus chemotherapy|DRUG: Chemotherapy	FEMALE	ADULT, OLDER_ADULT	PHASE2	INTERVENTIONAL	Allocation: RANDOMIZED|Intervention Model: PARALLEL|Masking: NONE|Primary Purpose: TREATMENT	2019-10-20	2020-06-30
NCT03379909	Phase II Study of Oral Metformin for Intravesical Treatment of Non-muscle-invasive Bladder Cancer	RECRUITING	A multi-center, open-label, phase II clinical study of metformin in up to evaluable 49 patients with low-grade NMIBC with the aim to determine the overall response to administration of oral metformin for 3 months in a index papillary NMIBC tumour.	Superficial Bladder Cancer|Bladder Cancer	DRUG: Metformin	ALL	ADULT, OLDER_ADULT	PHASE2	INTERVENTIONAL	Allocation: NA|Intervention Model: SINGLE_GROUP|Masking: NONE|Primary Purpose: TREATMENT	2019-09-01	2029-10-01
NCT04852510	Amelioration of Polycystic Ovary Syndrome Related Disorders by Supplementation of Thymoquinone and Metformin	COMPLETED	Objective: To investigate the potential benefit of adding Thymoquinone to Metformin in alleviating symptoms of polycystic ovarian syndrome. Methods: 207 overweight and obese PCOS Patients were divided into two groups. Patients in Group A, received Metformin 500 mg three times daily for 6 months. Patients in Group B, received a combination of Metformin 500 mg and Thymoquinone in the form of Black …	Polycystic Ovary Syndrome (PCOS)	DRUG: Metformin Versus a combination of Metformin and Thymoquinone (TQ)	FEMALE	ADULT	PHASE2|PHASE3	INTERVENTIONAL	Allocation: RANDOMIZED|Intervention Model: PARALLEL|Masking: NONE|Primary Purpose: TREATMENT	2019-02-01	2020-08-31
NCT03800602	Nivolumab and Metformin in Patients With Treatment Refractory MSS Colorectal Cancer	ACTIVE_NOT_RECRUITING	This phase II trial studies how well nivolumab and metformin work in treating patients with microsatellite stable (MSS) stage IV colorectal cancer that has not responded to previous treatment. Immunotherapy with monoclonal antibodies, such as nivolumab, may help the body's immune system attack the cancer, and may interfere with the ability of tumor cells to grow and spread. Metformin is an antidi…	Colorectal Adenocarcinoma|Metastatic Microsatellite Stable Colorectal Carcinoma|Refractory Colorectal Carcinoma|Stage IV Colorectal Cancer|Stage IVA Colorectal Cancer|Stage IVB Colorectal Cancer|Stage IVC Colorectal Cancer|Colorectal Cancer Metastatic	DRUG: Metformin|BIOLOGICAL: Nivolumab	ALL	ADULT, OLDER_ADULT	PHASE2	INTERVENTIONAL	Allocation: NA|Intervention Model: SINGLE_GROUP|Masking: NONE|Primary Purpose: TREATMENT	2019-01-15	2025-01-31
NCT03675893	Abemaciclib + Letrozole +/- Metformin in Recurrent or Persistent Endometrial Cancer	RECRUITING	This research study is studying a combination of targeted therapies as a possible treatment for estrogen-receptor positive (ER+) endometrial cancer. The drugs involved in this study are: * Abemaciclib (also known as Verzenioâ„¢) * Letrozole (also known as FemaraÂ®) * Metformin (also known as GlucophageÂ®)	Endometrial Cancer	DRUG: Letrozole|DRUG: Abemaciclib|DRUG: LY3023414|DRUG: Metformin	FEMALE	ADULT, OLDER_ADULT	PHASE2	INTERVENTIONAL	Allocation: NON_RANDOMIZED|Intervention Model: SEQUENTIAL|Masking: NONE|Primary Purpose: TREATMENT	2018-12-24	2026-05-01
NCT05292573	Longitudinal Follow-up in Women With Endometrial Hyperplasia Without Atypia	RECRUITING	This study will prospectively enroll a total of 1000 patients (200 per year) simple hyperplasia/complex hyperplasia (SH/CH) without atypia. All subjects will receive education for exercise and weight control and be randomized 1:1 to with or without metformin intervention. At the end of this 3-year project, an interim analysis will be performed. Since long-term follow-up is intended, therefore for…	Female	DRUG: Metformin	FEMALE	ADULT, OLDER_ADULT	PHASE3	INTERVENTIONAL	Allocation: RANDOMIZED|Intervention Model: PARALLEL|Masking: NONE|Primary Purpose: HEALTH_SERVICES_RESEARCH	2018-08-01	2026-01-29
NCT03674385	Efficacy of Vit E in PCOS Resistant to Clomiphene Citrate	COMPLETED	This study evaluate the addition of Vit E to clomiphene citrate in the treatment of poly cystic ovary.Half the patients will receive both Vit E and clomiphene citrate the other half will receive clomiphene citrate only.	Clomiphene Citrate Resistant Polycystic Ovary Syndrome	DIETARY_SUPPLEMENT: vitamin E|DRUG: Metformin|DRUG: Clomiphene Citrate	FEMALE	ADULT	PHASE2	INTERVENTIONAL	Allocation: RANDOMIZED|Intervention Model: PARALLEL|Masking: NONE|Primary Purpose: TREATMENT	2018-07-19	2019-03-30
NCT03031821	Metformin in Patients Initiating ADT as Prevention and Intervention of Metabolic Syndrome	ACTIVE_NOT_RECRUITING	This is a multi-centre, double-blind, randomized phase III trial comparing metformin to placebo in patients with advanced prostate cancer starting (or have recently started) androgen deprivation therapy (ADT).	Prostate Cancer|Metabolic Syndrome	DRUG: Metformin|DRUG: Placebo Oral Tablet	MALE	ADULT, OLDER_ADULT	PHASE3	INTERVENTIONAL	Allocation: RANDOMIZED|Intervention Model: PARALLEL|Masking: QUADRUPLE (PARTICIPANT, CARE_PROVIDER, INVESTIGATOR, OUTCOMES_ASSESSOR)|Primary Purpose: PREVENTION	2018-07-12	2023-11-24
NCT03359681	Metformin Treatment for Colon Cancer	COMPLETED	This is a double-blinded placebo controlled randomized trial examining the effect of metformin in non-diabetic patients with colon cancer on cell growth, immunological and metabolic changes. Patients are randomized to receive metformin 20 days before and 10 days after surgery. Tumor samples are examined for changes in level of cell growth and the composition of tumor cells in the tumor is examine…	Colon Cancer	DRUG: Metformin Hydrochloride|DRUG: Placebo oral capsule	ALL	ADULT, OLDER_ADULT	PHASE2	INTERVENTIONAL	Allocation: RANDOMIZED|Intervention Model: PARALLEL|Masking: QUADRUPLE (PARTICIPANT, CARE_PROVIDER, INVESTIGATOR, OUTCOMES_ASSESSOR)|Primary Purpose: TREATMENT	2018-07-10	2021-10-04
NCT03200015	Rituximab, Cyclophosphamide, Vincristine and Prednisone (R-CHOP) Plus Metformin in Diffuse Large-B-cell Lymphoma	COMPLETED	Evaluation of the safety and effectiveness of metformin as an adjunct to RCHOP chemotherapy for patients with newly diagnosed diffuse large-B cell lymphoma	Diffuse Large B Cell Lymphoma	DRUG: Metformin	ALL	ADULT, OLDER_ADULT	PHASE2	INTERVENTIONAL	Allocation: NA|Intervention Model: SINGLE_GROUP|Masking: NONE|Primary Purpose: TREATMENT	2017-10-01	2019-01-27
NCT03008551	Empagliflozin vs Metformin in PCOS	COMPLETED	This a randomised open-label parallel study involving women with polycystic ovary syndrome (PCOS). The patients will be randomised either to metformin 1500mg or empagliflozin 25mg daily for three months. The aim of the study is to examine the effect of empagliflozin on hormonal, metabolic and cardiovascular risk markers and quality of life in women with PCOS.	Polycystic Ovary Syndrome	DRUG: Empagliflozin|DRUG: Metformin	FEMALE	ADULT	PHASE2|PHASE3	INTERVENTIONAL	Allocation: RANDOMIZED|Intervention Model: PARALLEL|Masking: NONE|Primary Purpose: HEALTH_SERVICES_RESEARCH	2017-08-18	2018-04-02
NCT03238495	Randomized Trial of Neo-adjuvant Chemotherapy With or Without Metformin for HER2 Positive Operable Breast Cancer	RECRUITING	The primary objective of this study is to determine the efficacy of metformin as a repurposed agent in human epidermal growth factor receptor 2 (HER2) positive breast cancer when added to standard neo-adjuvant chemotherapy.	HER2-positive Breast Cancer	DRUG: Taxotere, Carboplatin, Herceptin + Pertuzumab|DRUG: Metformin	FEMALE	ADULT, OLDER_ADULT	PHASE2	INTERVENTIONAL	Allocation: RANDOMIZED|Intervention Model: PARALLEL|Masking: NONE|Primary Purpose: TREATMENT	2017-08-15	2023-06-01
NCT03135301	Letrozole in Clomiphene Resistant Infertile Women With Polycystic Ovarian Syndrome	RECRUITING	Polycystic ovary syndrome accounts for the vast majority of anovulatory symptoms and hyperandrogenism in women. The diagnosis of Polycystic ovary syndrome has life-long implications, with increased risk for infertility, metabolic syndrome, and type 2 diabetes mellitus, and possibly for cardiovascular disease and endometrial carcinoma. Polycystic ovary syndrome is diagnosed in adolescents with oth…	Infertility, Female	DRUG: letrozole plus metformin|DRUG: letrozole	FEMALE	CHILD, ADULT, OLDER_ADULT	PHASE3	INTERVENTIONAL	Allocation: RANDOMIZED|Intervention Model: PARALLEL|Masking: NONE|Primary Purpose: TREATMENT	2017-06-20	2024-03-01
NCT03076281	Metformin Hydrochloride and Doxycycline in Treating Patients With Head and Neck Squamous Cell Carcinoma That Can Be Removed by Surgery	ACTIVE_NOT_RECRUITING	This randomized phase II trial studies how well metformin hydrochloride and doxycycline work in treating patients with head and neck squamous cell carcinoma that can be removed by surgery. Metformin hydrochloride may reduce the metabolic activity of cancer cells and of surrounding supportive tissue. Doxycycline may minimize toxic side effects of anti-cancer therapy. Giving metformin hydrochloride…	Larynx|LIP|Oral Cavity|Pharynx	DRUG: Metformin Hydrochloride|DRUG: Doxycycline|DRUG: Metformin +Doxycycline	ALL	ADULT, OLDER_ADULT	PHASE2	INTERVENTIONAL	Allocation: RANDOMIZED|Intervention Model: PARALLEL|Masking: SINGLE (OUTCOMES_ASSESSOR)|Primary Purpose: TREATMENT	2017-04-03	2020-08-01
NCT02949700	Phase I/II Study OF Metformin in Combination With Cisplatin and Radiation in Head and Neck Squamous Cell Carcinoma	COMPLETED	The purpose of this research is to see whether metformin can improve the response rate in patients undergoing chemotherapy and radiation for squamous cell carcinoma of the oral cavity, oropharynx, larynx or hypopharynx. The purpose of this research is also to see the effects, good and bad, of metformin therapy for this disease. Researchers will also analyze tumor and blood samples from study pati…	Head and Neck Squamous Cell Carcinoma	DRUG: Metformin	ALL	ADULT, OLDER_ADULT	PHASE1|PHASE2	INTERVENTIONAL	Allocation: NA|Intervention Model: SINGLE_GROUP|Masking: NONE|Primary Purpose: TREATMENT	2017-01-26	2022-07-07
NCT03109847	Metformin Hydrochloride in Mitigating Side Effects of Radioactive Iodine Treatment in Patients With Differentiated Thyroid Cancer	COMPLETED	This pilot clinical trial studies how will metformin hydrochloride works in mitigating the side effects of radioactive iodine treatment in patients with differentiated thyroid cancer. Metformin hydrochloride may reduce the metabolic activity of cancer cell and of surrounding supportive tissues.	Thyroid	DRUG: Metformin Hydrochloride|OTHER: Radioactive Iodine|OTHER: Placebo	ALL	ADULT, OLDER_ADULT	PHASE2	INTERVENTIONAL	Allocation: RANDOMIZED|Intervention Model: PARALLEL|Masking: DOUBLE (PARTICIPANT, CARE_PROVIDER)|Primary Purpose: SUPPORTIVE_CARE	2017-01-05	2022-12-07
NCT02946996	Study of Pharmacologic Manipulation of AGE (Advanced Glycation Endproducts) Levels in Prostate Cancer Patients Receiving Androgen Deprivation Therapy	RECRUITING	The purpose of this study is to look at the effect that the study drug OPC has on AGE levels in patients with prostate cancer.	Prostate Cancer	DRUG: Metformin|OTHER: OPC	MALE	ADULT, OLDER_ADULT	PHASE2	INTERVENTIONAL	Allocation: NA|Intervention Model: SINGLE_GROUP|Masking: NONE|Primary Purpose: TREATMENT	2016-12-28	2024-03-30
NCT03053544	Metformin With Neoadjuvant Chemoradiation to Improve Pathologic Responses in Rectal Cancer	COMPLETED	This study is a phase II, single arm, controlled, open label internal pilot.	Rectal Neoplasm Carcinoma in Situ Adenocarcinoma	DRUG: Metformin	ALL	ADULT, OLDER_ADULT	PHASE2	INTERVENTIONAL	Allocation: NA|Intervention Model: SINGLE_GROUP|Masking: NONE|Primary Purpose: TREATMENT	2016-12-08	2019-06-26
NCT03086733	Phase II Lung Metcore - Preoperative Metformin for Lung Cancer	COMPLETED	This is a phase II single centre open label single arm pre-operative window of metformin treatment in stage I-IIIa Non small cell lung cancer. In which patients will be invited to participate by receiving Metformin treatment during 14 to 21 days at 850 mg BID until the day before surgery. They will be followed closely for any Adverse Events during treatment and 30 days after surgery. During treat…	Non Small Cell Lung Cancer|Lung Cancer	DRUG: Metformin	ALL	ADULT, OLDER_ADULT	PHASE2	INTERVENTIONAL	Allocation: NA|Intervention Model: SINGLE_GROUP|Masking: NONE|Primary Purpose: TREATMENT	2016-12-05	2020-08-01
NCT03792984	The Effect of Calcium and Vitamin D Supplements on Metabolic and Hormonal Disturbances in Polycystic Ovary Syndrome Patients	COMPLETED	The aim of this study is to investigate the safety and metabolic-hormonal efficiency of supplementation vitamin D deficient/insufficient PCOS women with (calcium +vitamin D + metformin) for 8 weeks compared to (placebo+ metformin).	Polycystic Ovary Syndrome|Vitamin D Deficiency/Insufficiency	DIETARY_SUPPLEMENT: Vitamin D3|DIETARY_SUPPLEMENT: Calcium Carbonate|DRUG: Metformin|DRUG: Placebo	FEMALE	ADULT	PHASE3	INTERVENTIONAL	Allocation: RANDOMIZED|Intervention Model: PARALLEL|Masking: SINGLE (PARTICIPANT)|Primary Purpose: TREATMENT	2016-12-01	2017-12-30
NCT03243851	Study on Low Dose Temozolomide Plus Metformin or Placebo in Patient With Recurrent or Refractory Glioblastoma	COMPLETED	A phase 2 clinical trial for the efficacy and safety of low dose Temozolomide plus metformin as combination chemotherapy compared with low dose Temozolomide plus placebo in patient with recurrent or refractory Glioblastoma	Glioblastoma	DRUG: Temozolomide+Metformin|DRUG: Temozolomide+Placebo	ALL	ADULT, OLDER_ADULT	PHASE2	INTERVENTIONAL	Allocation: RANDOMIZED|Intervention Model: PARALLEL|Masking: QUADRUPLE (PARTICIPANT, CARE_PROVIDER, INVESTIGATOR, OUTCOMES_ASSESSOR)|Primary Purpose: TREATMENT	2016-11-21	2020-12-31
NCT02755844	Safety and Efficacy of Metronomic Cyclophosphamide, Metformin and Olaparib in Endometrial Cancer Patients	COMPLETED	Endometrial cancer ranks 11th in terms of incidence (7275 / year) and mortality (2025 deaths/ year). The 5-year overall survivals of patients at diagnosis with locally advanced and metastatic carcinomas are about 50% and 15% respectively. Beyond first line treatment with platinum-based chemotherapy, there is lack of effective drug in this disease, which explains the poor prognosis of patients. Th…	Recurrent Endometrial Cancer	DRUG: Olaparib|DRUG: metformin|DRUG: metronomic cyclophosphamide	FEMALE	ADULT, OLDER_ADULT	PHASE1|PHASE2	INTERVENTIONAL	Allocation: NA|Intervention Model: SINGLE_GROUP|Masking: NONE|Primary Purpose: TREATMENT	2016-09-23	2020-06-01
NCT04691960	A Pilot Study of Ketogenic Diet and Metformin in Glioblastoma: Feasibility and Metabolic Imaging	RECRUITING	This clinical trial is for men and women with high-grade gliomas. Glucose (sugar) is thought to be a contributor to tumor growth. The ketogenic diet (a high fat, low carbohydrate diet) and metformin (a drug approved by the Food and Drug Administration to treat type 2 diabetes) are both known to lower blood glucose levels. The purpose of the study is to evaluate the tolerability of a ketogenic die…	Glioblastoma	OTHER: Ketogenic Diet|DRUG: Metformin	ALL	ADULT, OLDER_ADULT	PHASE2	INTERVENTIONAL	Allocation: NA|Intervention Model: SINGLE_GROUP|Masking: NONE|Primary Purpose: TREATMENT	2016-08-01	2024-12-01
NCT02581137	Metformin Hydrochloride in Preventing Oral Cancer in Patients With an Oral Premalignant Lesion	ACTIVE_NOT_RECRUITING	This phase IIa trial studies how well metformin hydrochloride works in preventing oral cancer in patients with an oral premalignant lesion (oral leukoplakia or erythroplakia). Oral premalignant lesions look like red or whitish plaques or lesions in the mouth that do not rub off and can be associated with a higher risk of cancer. Metformin hydrochloride may help prevent oral cancer from forming in…	Erythroplakia|Hyperplasia|Oral Cavity Carcinoma|Oral Leukoplakia	OTHER: Laboratory Biomarker Analysis|DRUG: Metformin Hydrochloride	ALL	ADULT, OLDER_ADULT	PHASE2	INTERVENTIONAL	Allocation: NA|Intervention Model: SINGLE_GROUP|Masking: NONE|Primary Purpose: PREVENTION	2016-06-10
NCT02874430	Metformin Hydrochloride and Doxycycline in Treating Patients With Localized Breast or Uterine Cancer	ACTIVE_NOT_RECRUITING	This phase II trial studies how well metformin hydrochloride works together with doxycycline in treating patients with localized breast or uterine cancer. Metformin hydrochloride may stop the growth of cancer cells by blocking some of the enzymes needed for cell growth. Doxycycline may stop the growth of bacteria by keeping them from making proteins and minimized the toxic side effects of anti-ca…	Breast Carcinoma|Endometrial Clear Cell Adenocarcinoma|Endometrial Serous Adenocarcinoma|Uterine Corpus Cancer|Uterine Corpus Carcinosarcoma	DRUG: Metformin Hydrochloride|DRUG: Doxycycline	FEMALE	ADULT, OLDER_ADULT	PHASE2	INTERVENTIONAL	Allocation: NA|Intervention Model: SINGLE_GROUP|Masking: NONE|Primary Purpose: TREATMENT	2016-06-08	2023-06-01
NCT02635386	EQW, DAPA, EQW/DAPA, DAPA/MET ER and PHEN/TPM ER in Obese Women With PolycysticOvary Syndrome (PCOS)	COMPLETED	This is a randomized, single-blind, parallel 5 treatment group 24-week trial designed to directly compare the therapeutic effects of exenatide once weekly (EQW), dapagliflozin (DAPA), EQW plus DAPA, combined DAPA/metformin extended release (XR) and the weight loss medication, phentermine/topiramate extended release (PHEN/TPM ER) on metabolic and endocrinological parameters in overweight/obese non…	Polycystic Ovary Syndrome|Obesity	DRUG: Exenatide once weekly (EQW )|DRUG: Dapagliflozin (DAPA)|DRUG: EQW plus DAPA|DRUG: Dapagliflozin plus Glucophage (MET ER)|DRUG: Phentermine /Topiramate (PHEN/ TPM) ER	FEMALE	ADULT	PHASE3	INTERVENTIONAL	Allocation: RANDOMIZED|Intervention Model: PARALLEL|Masking: SINGLE (INVESTIGATOR)|Primary Purpose: TREATMENT	2016-03-22	2020-10-09
NCT02647827	Acupuncture or Metformin for Insulin Resistance in Women With PCOS	RECRUITING	The hypothesis is that acupuncture is equally effective as metformin (both treatments combined with lifestyle management) in improving whole body glucose homeostasis in insulin resistant women with polycystic ovary syndrome (PCOS), and that both are superior to lifestyle management alone. The investigators hypothesize that acupuncture and metformin induce ovulation and improve hyperandrogenism, a…	Polycystic Ovary Syndrome|Insulin Resistance|Hyperandrogenism	OTHER: Lifestyle management|DEVICE: Acupuncture|DRUG: Metformin	FEMALE	ADULT	PHASE2	INTERVENTIONAL	Allocation: RANDOMIZED|Intervention Model: PARALLEL|Masking: NONE|Primary Purpose: TREATMENT	2015-12-01	2025-12-01
NCT02614859	Bicalutamide With or Without Metformin for Biochemical Recurrence in Overweight or Obese Prostate Cancer Patients	COMPLETED	Obesity and metabolic syndrome are prevalent among prostate cancer patients. Having an elevated insulin level in the blood is associated with a shorter median time to cancer progression and median overall survival in patients with an elevated PSA after prior treatment. Androgen deprivation therapy (ADT) with drugs like bicalutamide is frequently used in this patient population,with no proven bene…	Cancer of Prostate	DRUG: Observation and Bicalutamide|DRUG: Metformin and Bicalutamide	MALE	ADULT, OLDER_ADULT	PHASE2	INTERVENTIONAL	Allocation: RANDOMIZED|Intervention Model: PARALLEL|Masking: NONE|Primary Purpose: TREATMENT	2015-12-01	2020-01-24
NCT02496741	Metformin And Chloroquine in IDH1/2-mutated Solid Tumors	COMPLETED	This phase Ib, open-label, single-center, non-randomized clinical trial will evaluate the toxicity and efficacy of metformin and chloroquine in isocitrate dehydrogenase 1/2-mutated (IDH1/2MT) patients with a glioma, intrahepatic cholangiocarcinoma or chondrosarcoma.	Glioma|Cholangiocarcinoma|Chondrosarcoma	DRUG: Metformin and chloroquine combination	ALL	ADULT, OLDER_ADULT	PHASE1|PHASE2	INTERVENTIONAL	Allocation: NA|Intervention Model: SINGLE_GROUP|Masking: NONE|Primary Purpose: TREATMENT	2015-11-01	2019-11-18
NCT02491333	The RCT of Acupuncture on PCOS Combined With IR	COMPLETED	The objectives of this randomized controlled trial are to compare insulin sensitivity following true acupuncture + placebo metformin (Group 1) vs sham acupuncture + placebo metformin (Group 2) vs sham acupuncture + metformin (Group 3) in women with PCOS and IR.	Polycystic Ovary Syndrome|Insulin Resistance	OTHER: true acupuncture|OTHER: sham acupuncture|DRUG: metformin|DRUG: Placebo metformin	FEMALE	ADULT	PHASE3	INTERVENTIONAL	Allocation: RANDOMIZED|Intervention Model: PARALLEL|Masking: QUADRUPLE (PARTICIPANT, CARE_PROVIDER, INVESTIGATOR, OUTCOMES_ASSESSOR)|Primary Purpose: TREATMENT	2015-08-01	2018-10-01
NCT02394652	The Potential for Metformin to Improve Tumor Oxygenation in Locally Advanced Cervix Cancer: A Phase II Randomized Trial	COMPLETED	Cervical cancer remains an important health problem worldwide. Poor tumor oxygenation (hypoxia) is associated with inferior survival in cervical cancer and resistance to radiation treatment. Hypoxia-modifying therapies improve survival, but existing therapies are impractical and/or toxic. Metformin, a non-toxic drug for diabetes, has been shown to decrease tumor hypoxia in animal studies and its …	Uterine Cervical Neoplasms|Squamous Cell Carcinoma|Adenocarcinoma|Carcinoma, Adenosquamous	DRUG: Metformin|DRUG: Cisplatin|DRUG: FAZA	FEMALE	ADULT, OLDER_ADULT	PHASE2	INTERVENTIONAL	Allocation: RANDOMIZED|Intervention Model: PARALLEL|Masking: NONE|Primary Purpose: TREATMENT	2015-05-21	2021-01-12
NCT02437656	Combination of Metformin to Neoadjuvant Radiochemotherapy in the Treatment of Locally Advanced Rectal Cancer (METCAP).	COMPLETED	Metformin is an oral antidiabetic of the biguanide class derived from galega officinalis. Historical cohort of patients with diabetes have shown that diabetics on Metformin had a better chance of survival than diabetics not on Metformin. These observations have led to in vitro studies of metformin on cancer cells. It was thus demonstrated that Metformin has anti-proliferative properties. The aim …	Rectal Cancer	DRUG: Metformin	ALL	ADULT, OLDER_ADULT	PHASE2	INTERVENTIONAL	Allocation: NA|Intervention Model: SINGLE_GROUP|Masking: NONE|Primary Purpose: TREATMENT	2015-05-01	2017-03-01
NCT02431676	Survivorship Promotion In Reducing IGF-1 Trial	COMPLETED	This is a prospective, single-center randomized trial with three arms, and an allocation ratio of 1:1:1. The study design is an efficacy study to evaluate the effect of metformin and coach-directed behavioral weight loss versus self-directed weight loss on insulin-like growth factor (IGF)-1 and IGF-1 to THE IGFBP-III ratio blood levels after 6 and 12 months of intervention. The coach-directed Beh…	Breast Cancer|Prostate Cancer|Lung Cancer|Colon Cancer|Melanoma of Skin|Endometrial Cancer|Liver Cancer|Pancreatic Cancer|Rectal Cancer|Kidney Cancer|Other Solid Malignant Tumors	DRUG: Metformin|BEHAVIORAL: Coach Directed Behavioral Weight Loss|BEHAVIORAL: Self-control weight loss	ALL	ADULT, OLDER_ADULT	PHASE2	INTERVENTIONAL	Allocation: RANDOMIZED|Intervention Model: PARALLEL|Masking: SINGLE (OUTCOMES_ASSESSOR)|Primary Purpose: PREVENTION	2015-05-01	2018-12-01
NCT02365597	An Efficacy and Safety Study of Erdafitinib (JNJ-42756493) in Participants With Urothelial Cancer	ACTIVE_NOT_RECRUITING	The purpose of this study is to evaluate the objective response rate (complete response \[CR\]+ partial response \[PR\]) of the selected dose regimen in participants with metastatic or surgically unresectable urothelial cancers that harbor specific FGFR genomic alterations.	Urothelial Cancer	DRUG: Erdafitinib|DRUG: Midazolam|DRUG: Metformin	ALL	ADULT, OLDER_ADULT	PHASE2	INTERVENTIONAL	Allocation: NA|Intervention Model: SINGLE_GROUP|Masking: NONE|Primary Purpose: TREATMENT	2015-04-22	2023-12-29
NCT02780024	Metformin, Neo-adjuvant Temozolomide and Hypo- Accelerated Radiotherapy Followed by Adjuvant TMZ in Patients With GBM	ACTIVE_NOT_RECRUITING	Glioblastoma Multiforme is one of the most common, and unfortunately one of the most aggressive brain tumors in adults with most of the patients recurring and dying of the disease with a median survival of 16 months from diagnosis. Current treatment for patients with newly diagnosed Glioblastoma Multiforme (GBM) is safe maximal surgical resection followed by concomitant conventional Radiotherapy …	Glioblastoma Multiforme	DRUG: Metformin	ALL	ADULT, OLDER_ADULT	PHASE2	INTERVENTIONAL	Allocation: NA|Intervention Model: SINGLE_GROUP|Masking: NONE|Primary Purpose: TREATMENT	2015-03-01	2026-02-28
NCT01905046	Metformin Hydrochloride in Preventing Breast Cancer in Patients With Atypical Hyperplasia or In Situ Breast Cancer	ACTIVE_NOT_RECRUITING	This randomized phase III trial studies metformin hydrochloride to see how well it works compared to placebo in preventing breast cancer in patients with atypical hyperplasia or in situ breast cancer. Chemoprevention is the use of certain drugs to keep cancer from forming. The use of metformin hydrochloride may prevent breast cancer.	Atypical Ductal Breast Hyperplasia|BRCA1 Mutation Carrier|BRCA2 Mutation Carrier|Ductal Breast Carcinoma in Situ|Lobular Breast Carcinoma in Situ	DRUG: metformin hydrochloride|OTHER: placebo	FEMALE	ADULT	PHASE3	INTERVENTIONAL	Allocation: RANDOMIZED|Intervention Model: CROSSOVER|Masking: DOUBLE (PARTICIPANT, INVESTIGATOR)|Primary Purpose: PREVENTION	2015-02-01	2025-11-01
NCT02488564	A Study of Liposomal Doxorubicin + Docetaxel + Trastuzumab + Metformin in Operable and Locally Advanced HER2 Positive Breast Cancer	COMPLETED	It is a multicenter, open-label, two stage phase II trial, to assess activity, safety and potential early predictors of response in neoadjuvant setting. Patients with operable breast cancer (T1c and cytologically N1-2, or cT2-3, N0-N2, M0) or locally advanced breast cancer (T4a-d, N0-N2, M0) with overexpression or amplification of HER2 (AJCC 7th edition 2010) are included in the study. The primar…	HER-2 Positive Breast Cancer	DRUG: Liposomal doxorubicin|DRUG: Docetaxel|DRUG: Trastuzumab|DRUG: Metformin	ALL	ADULT, OLDER_ADULT	PHASE2	INTERVENTIONAL	Allocation: NA|Intervention Model: SINGLE_GROUP|Masking: NONE|Primary Purpose: TREATMENT	2014-12-17	2020-04-01
NCT01999686	PCOS Treatment Using DLBS3233, Metformin, and Combination of Both	COMPLETED	This is a 3-arm, randomized, double-blind, double-dummy, and controlled clinical study over 6 months of treatment to evaluate the metabolic and clinical efficacy as well as the safety of DLBS3233 alone, metformin and combination of both, in improving metabolic and reproductive parameters.	Polycystic Ovary Syndrome (PCOS)|Insulin Resistance	DRUG: DLBS3233|DRUG: Metformin XR|DRUG: Placebo metformin|DRUG: Placebo DLBS3233	FEMALE	ADULT	PHASE3	INTERVENTIONAL	Allocation: RANDOMIZED|Intervention Model: PARALLEL|Masking: QUADRUPLE (PARTICIPANT, CARE_PROVIDER, INVESTIGATOR, OUTCOMES_ASSESSOR)|Primary Purpose: TREATMENT	2014-10-01	2019-05-01
NCT02186847	Chemotherapy and Radiation Therapy With or Without Metformin Hydrochloride in Treating Patients With Stage III Non-small Cell Lung Cancer	ACTIVE_NOT_RECRUITING	This randomized phase II trial studies how well chemotherapy and radiation therapy given with or without metformin hydrochloride works in treating patients with stage III non-small cell lung cancer. Drugs used in chemotherapy, such as carboplatin and paclitaxel, work in different ways to stop the growth of tumor cells, either by killing the cells, by stopping them from dividing, or by stopping th…	Adenosquamous Lung Carcinoma|Bronchioloalveolar Carcinoma|Large Cell Lung Carcinoma|Lung Adenocarcinoma|Non-Small Cell Lung Carcinoma|Recurrent Non-Small Cell Lung Carcinoma|Squamous Cell Lung Carcinoma|Stage IIIA Non-Small Cell Lung Cancer|Stage IIIB Non-Small Cell Lung Cancer	RADIATION: Radiation Therapy|DRUG: Carboplatin|DRUG: Metformin|DRUG: Paclitaxel	ALL	ADULT, OLDER_ADULT	PHASE2	INTERVENTIONAL	Allocation: RANDOMIZED|Intervention Model: PARALLEL|Masking: NONE|Primary Purpose: TREATMENT	2014-08-01	2024-04-16
NCT02157974	Liver and Fat Regulation in Overweight Adolescent Girls	COMPLETED	Women with polycystic ovarian syndrome (PCOS) have increased rates of hepatic steatosis compared to weight similar women with regular menses. It is unclear if this is related to high testosterone or insulin resistance. The investigators will assess hepatic glucose release, rates of lipolysis and hepatic de novo lipogenesis in the fasted and postprandial state to determine if alterations in the pr…	Hepatic Steatosis|Polycystic Ovarian Syndrome|Obesity	DRUG: Byetta 5Mcg Pen Injection	FEMALE	CHILD, ADULT	PHASE2|PHASE3	INTERVENTIONAL	Allocation: NON_RANDOMIZED|Intervention Model: SINGLE_GROUP|Masking: NONE|Primary Purpose: OTHER	2014-08-01	2022-12-01
NCT02040376	Metformin for Brain Repair in Children With Cranial-Spinal Radiation for Medulloblastoma	COMPLETED	A placebo controlled double blind crossover trial of metformin in 30 children treated with radiation for medulloblastoma - the most common malignant brain tumour. The investigators used tests of thinking and learning and brain imaging techniques to examine whether metformin can enhance cognition or promote brain repair following radiation-induced brain injury.	Brain Tumor Treated With Cranial or Cranial-Spinal Radiation	DRUG: Metformin|DRUG: Placebo	ALL	CHILD, ADULT	PHASE3	INTERVENTIONAL	Allocation: RANDOMIZED|Intervention Model: CROSSOVER|Masking: QUADRUPLE (PARTICIPANT, CARE_PROVIDER, INVESTIGATOR, OUTCOMES_ASSESSOR)|Primary Purpose: TREATMENT	2014-06-13	2017-12-15
NCT02176161	Metformin Prostate Cancer Adjuvant Trial	COMPLETED	This is a Phase II clinical study to determine if Metformin can increase Prostate Specific Antigen (PSA) doubling time for patients with Prostate Cancer who have failed primary treatment with radiation, or surgical patients that are at high risk for recurrence based on surgical pathology. Men with confirmed prostate cancer and rising serum PSA levels will receive Metformin and will be monitored f…	Prostate Cancer|Prostate Cancer Recurrent	DRUG: Metformin Hydrochloride Extended Release 750mg	MALE	ADULT, OLDER_ADULT	PHASE2	INTERVENTIONAL	Allocation: NON_RANDOMIZED|Intervention Model: PARALLEL|Masking: NONE|Primary Purpose: TREATMENT	2014-06-01	2021-07-21
NCT02028221	Phase II Study of Metformin for Reduction of Obesity-Associated Breast Cancer Risk	COMPLETED	Overweight and obesity are well established risk factors for breast cancer that develop after menopause. The increased postmenopausal breast cancer risk in women who are overweight or obese is likely to be attributed to multiple metabolic disturbances. Metformin is a commonly used medication in diabetics to stabilize blood sugar. Association studies and laboratory studies have shown its potential…	Breast Cancer Prevention	DRUG: Metformin|DRUG: Placebo	FEMALE	ADULT	PHASE2	INTERVENTIONAL	Allocation: RANDOMIZED|Intervention Model: PARALLEL|Masking: DOUBLE (PARTICIPANT, INVESTIGATOR)|Primary Purpose: PREVENTION	2014-03-07	2022-06-14
NCT02022007	Saxagliptin + Metformin Compared to Saxagliptin or Metformin Monotherapy in PCOS Women With Impaired Glucose Homeostasis	COMPLETED	The objective of the present proposal is to compare the clinical, endocrine and metabolic effects of therapy with combination saxagliptin and metformin to saxagliptin and metformin monotherapy in women with PCOS and prediabetic hyperglycemia (IFG, IGT or IFG/IGT). Saxagliptin is an oral dipeptidyl peptidase IV (DPP-4) inhibitor whose mechanism of action is to prolong the duration of blood glucago…	Polycystic Ovary Syndrome|Disorder of Glucose Regulation	DRUG: Metformin XR|DRUG: Saxagliptin|DRUG: Saxagliptin-Metformin XR	FEMALE	ADULT	PHASE3	INTERVENTIONAL	Allocation: RANDOMIZED|Intervention Model: PARALLEL|Masking: SINGLE (INVESTIGATOR)|Primary Purpose: TREATMENT	2014-03-01	2016-10-01
NCT05053841	Implication of Metformin Plus Aromatase Inhibitor in Obese Postmenopausal Breast Cancer Women	COMPLETED	Metformin is an anti-diabetic oral hypoglycemic agent that considered the gold standard therapy for the treatment of type 2 diabetes. Retrospective analyses show that metformin can offer therapeutic benefits to patients with several forms of cancer. It also has positive weight reducing effect on non-diabetic patient by improving insulin sensitivity (although the exact underlying pathomechanisms r…	Metformin|Breast Cancer	DRUG: Metformin	FEMALE	ADULT, OLDER_ADULT	PHASE2	INTERVENTIONAL	Allocation: RANDOMIZED|Intervention Model: PARALLEL|Masking: NONE|Primary Purpose: OTHER	2014-02-01	2015-06-01
NCT02562664	Metformin Improves Clinical Pregnancy Rate in Polycystic Ovarian Syndrome Patients	COMPLETED	Polycystic ovary syndrome (PCOS) is the most common Female endocrine disorder , with a prevalence ranging between 6% to10% based on the National Institutes of Health (NIH) criteria and when the broader Rotterdam criteria are applied it reaches as high as 15%. Typically, PCOS can identify during the early adolescence. Insulin resistance is a common finding in the obese women with PCOS. It is most …	Reproductive Endocrinology|Polycystic Ovarian Syndrome	DRUG: CC|DRUG: Placebo tablets|DRUG: Metformin	FEMALE	ADULT	PHASE2	INTERVENTIONAL	Allocation: RANDOMIZED|Intervention Model: PARALLEL|Masking: DOUBLE (PARTICIPANT, INVESTIGATOR)|Primary Purpose: TREATMENT	2014-01-01	2014-07-01
NCT02005419	Metformin Combined With Gemcitabine as Adjuvant Therapy for Pancreatic Cancer After Curative Resection	COMPLETED	Pancreatic cancer represents the most lethal of the common malignancies with a 5-year survival rate of less than 5%. For patients who are eligible for potentially curative resection, despite mortality and morbidity rates after surgery have improved, the recurrence rate is up to 85% within 2 years. Data from clinical trials indicate that adjuvant chemotherapy enhances 5-year survival to \~25% for …	Stage IA Pancreatic Adenocarcinoma|Stage IB Pancreatic Adenocarcinoma|Stage IIA Pancreatic Adenocarcinoma|Stage IIB Pancreatic Adenocarcinoma	DRUG: Gemcitabine|DRUG: Metformin|DRUG: placebo	ALL	ADULT, OLDER_ADULT	PHASE2	INTERVENTIONAL	Allocation: RANDOMIZED|Intervention Model: PARALLEL|Masking: QUADRUPLE (PARTICIPANT, CARE_PROVIDER, INVESTIGATOR, OUTCOMES_ASSESSOR)|Primary Purpose: TREATMENT	2013-12-01	2017-12-01
NCT01797523	A Phase II, Single-Arm Study of RAD001 (Everolimus), Letrozole, and Metformin in Patients With Advanced or Recurrent Endometrial Carcinoma	ACTIVE_NOT_RECRUITING	The goal of this clinical research study is to learn if the combination of everolimus, letrozole, and metformin can help to control recurrent or progressive endometrial cancer. The safety of this drug combination will also be studied. Everolimus is designed to block a protein inside cancer cells that is involved in cancer growth. Letrozole is designed to block a protein from making estrogen. This…	Endometrial Cancer	DRUG: Metformin|DRUG: Letrozole|DRUG: Everolimus	ALL	ADULT, OLDER_ADULT	PHASE2	INTERVENTIONAL	Allocation: NA|Intervention Model: SINGLE_GROUP|Masking: NONE|Primary Purpose: TREATMENT	2013-10-07	2025-10-31
NCT01968317	Megestrol Acetate Plus Metformin to Megestrol Acetate in Patients With Endometrial Atypical Hyperplasia or Early Stage Endometrial Adenocarcinoma	COMPLETED	The purpose of this study is to see if megestrol acetate plus metformin will be more effective in returning the endometrial tissue to a normal state than megestrol acetate alone in patients with endometrial atypical hyperplasia or early stage endometrial adenocarcinoma.	Endometrial Atypical Hyperplasia|Endometrial Adenocarcinoma	DRUG: Megestrol acetate and metformin|DRUG: Megestrol acetate	FEMALE	ADULT	PHASE2	INTERVENTIONAL	Allocation: RANDOMIZED|Intervention Model: PARALLEL|Masking: NONE|Primary Purpose: TREATMENT	2013-10-01	2017-10-01
NCT01864096	The Metformin Active Surveillance Trial (MAST) Study	RECRUITING	This study aims to see if metformin can delay the time to progression in men with low risk prostate cancer when compared to a placebo.	Prostate Cancer	DRUG: Metformin|DRUG: Placebo	MALE	ADULT, OLDER_ADULT	PHASE3	INTERVENTIONAL	Allocation: RANDOMIZED|Intervention Model: PARALLEL|Masking: TRIPLE (PARTICIPANT, CARE_PROVIDER, INVESTIGATOR)|Primary Purpose: TREATMENT	2013-10-01	2024-08-01
NCT01877564	A Randomized Pilot Study to Evaluate the Effects of a Short Course of Metformin Versus No Therapy in the Period Prior to Hysterectomy for Grade 1-2 Adenocarcinoma of the Endometrium in Obese Non-Diabetic Women	COMPLETED	The purpose of this research is to determine the effects of Metformin, a well tolerated drug widely prescribed for treatment of Type 2 Diabetes Mellitus, on endometrium cancer patients.	Adenocarcinoma of the Endometrium	DRUG: Metformin	FEMALE	ADULT, OLDER_ADULT	PHASE2	INTERVENTIONAL	Allocation: RANDOMIZED|Intervention Model: PARALLEL|Masking: NONE|Primary Purpose: TREATMENT	2013-08-29	2017-07-10
NCT01677897	Impact of the Addition of Metformin to Abiraterone in Metastatic Prostate Cancer Patients	COMPLETED	The purpose of this study is to assess the impact of the addition of metformin to abiraterone on survival in patients with metastatic prostate cancer	Metastatic Prostate Cancer	DRUG: Metformin	MALE	ADULT, OLDER_ADULT	PHASE2	INTERVENTIONAL	Allocation: NA|Intervention Model: SINGLE_GROUP|Masking: NONE|Primary Purpose: TREATMENT	2013-08-01	2018-06-01
NCT01697566	An Endometrial Cancer Chemoprevention Study of Metformin	ACTIVE_NOT_RECRUITING	The goal of this clinical research study is to learn about the effects of metformin and/or a program called "lifestyle intervention" on the endometrium (inner lining of the uterus) in post-menopausal women who are also obese (both are risk factors for endometrial cancer). Researchers also want to learn how insulin levels will be affected by metformin, diet and/or exercise. Metformin is designed t…	Gynecology	DRUG: Metformin|OTHER: Placebo|PROCEDURE: Endometrial Biopsy|BEHAVIORAL: Lifestyle Intervention|BEHAVIORAL: Questionnaires	FEMALE	ADULT, OLDER_ADULT	PHASE3	INTERVENTIONAL	Allocation: RANDOMIZED|Intervention Model: PARALLEL|Masking: DOUBLE (PARTICIPANT, INVESTIGATOR)|Primary Purpose: TREATMENT	2013-05-02	2025-05-30
NCT01864681	Combination of Metformin With Gefitinib to Treat NSCLC	COMPLETED	The purpose of this study is to determine whether metformin in combination with gefitinib are effective in patients with previously untreated advanced or metastatic Non-Small-Cell Lung cancer with epidermal growth factor receptor (EGFR) mutations	NSCLC|EGFR Gene Amplification|Advanced Cancer|Stage IIIB NSCLC|Stage IV NSCLC	DRUG: Gefitinib and Metformin|DRUG: Gefitinib and placebo	ALL	ADULT, OLDER_ADULT	PHASE2	INTERVENTIONAL	Allocation: RANDOMIZED|Intervention Model: PARALLEL|Masking: DOUBLE (PARTICIPANT, INVESTIGATOR)|Primary Purpose: TREATMENT	2013-05-01	2018-06-04
NCT01733459	Efficacy and Safety of DLBS3233 in Subjects With Polycystic Ovary Syndrome (PCOS)	COMPLETED	This is a 2-arm, randomized, double-blind, double-dummy, and controlled clinical study, with 6 months of treatment to evaluate the clinical and metabolic efficacy of DLBS3233 in improving reproductive parameters and to evaluate the safety of DLBS3233 in women with polycystic ovary syndrome compared with metformin, as an active control.	Polycystic Ovary Syndrome (PCOS)	DRUG: DLBS3233|DRUG: Metformin XR|DRUG: Placebo caplet of Metformin XR|DRUG: Placebo capsule of DLBS3233	FEMALE	ADULT	PHASE3	INTERVENTIONAL	Allocation: RANDOMIZED|Intervention Model: PARALLEL|Masking: QUADRUPLE (PARTICIPANT, CARE_PROVIDER, INVESTIGATOR, OUTCOMES_ASSESSOR)|Primary Purpose: TREATMENT	2013-03-01	2018-06-01
NCT01666730	Metformin Plus Modified FOLFOX 6 in Metastatic Pancreatic Cancer	COMPLETED	This phase II trial studies how well metformin hydrochloride, leucovorin calcium, fluorouracil, and oxaliplatin work in treating patients with metastatic pancreatic cancer. Metformin hydrochloride may stop the growth of tumor cells by blocking some of the enzymes needed for cell growth. Drugs used in chemotherapy, such as leucovorin calcium, fluorouracil, and oxaliplatin, work in different ways t…	Acinar Cell Adenocarcinoma of the Pancreas|Duct Cell Adenocarcinoma of the Pancreas|Recurrent Pancreatic Cancer|Stage IV Pancreatic Cancer	DRUG: metformin hydrochloride|DRUG: oxaliplatin|DRUG: leucovorin calcium|DRUG: fluorouracil|OTHER: laboratory biomarker analysis	ALL	ADULT, OLDER_ADULT	PHASE2	INTERVENTIONAL	Allocation: NA|Intervention Model: SINGLE_GROUP|Masking: NONE|Primary Purpose: TREATMENT	2013-02-21	2018-08-01
NCT01725490	The Chemopreventive Effect of Metformin in Patients With Familial Adenomatous Polyposis: Double Blinded Randomized Controlled Study	COMPLETED	Familial adenomatous polyposis (FAP) leads to adenomas and eventual adenocarcinomas in colon and less frequently, duodenum. Chemopreventive strategies have been studied in FAP patients to delay the development of adenomas and cancers. The non-steroidal anti-inflammatory drugs (NSAIDs) and selective cyclooxygenase-2 inhibitor have shown the regression of colorectal and duodenal adenomas in FAP pat…	Familial Adenomatous Polyposis	DRUG: Metformin|DRUG: Metformin|DRUG: Placebo	ALL	ADULT, OLDER_ADULT	PHASE2	INTERVENTIONAL	Allocation: RANDOMIZED|Intervention Model: PARALLEL|Masking: QUADRUPLE (PARTICIPANT, CARE_PROVIDER, INVESTIGATOR, OUTCOMES_ASSESSOR)|Primary Purpose: TREATMENT	2013-02-15	2020-08-30
NCT01796028	Metformin-Docetaxel Association in Metastatic Hormone-refractory Prostate Cancer	COMPLETED	Prostate cancer is the second leading cause of mortality in men, representing 10 deaths about of 100 cancers (INVS 2009). Treatment for metastatic prostate cancer, when becoming resistant to hormone-treatment, is mostly resumed to a relatively ineffective chemotherapy (Docetaxel/TAXOTEREÂ®) (1). Recently, numerous clinical and preclinical works showed that Metformin could represent an excellent c…	Prostatic Neoplasms	DRUG: METFORMIN|DRUG: Placebo|DRUG: TAXOTEREÂ®	MALE	ADULT, OLDER_ADULT	PHASE2	INTERVENTIONAL	Allocation: RANDOMIZED|Intervention Model: PARALLEL|Masking: QUADRUPLE (PARTICIPANT, CARE_PROVIDER, INVESTIGATOR, OUTCOMES_ASSESSOR)|Primary Purpose: TREATMENT	2013-01-01	2018-05-31
NCT01686126	Improving the Treatment for Women With Early Stage Cancer of the Uterus	ACTIVE_NOT_RECRUITING	Currently the standard treatment for early stage endometrial cancer or endometrial hyperplasia with atypia is a total hysterectomy (an operation to remove the uterus) and removal of both ovaries. While highly effective, this surgery carries significant side effects for: * young women who still wish to have children and would lose fertility; and * women with one or more disorders (or diseases) in …	Complex Endometrial Hyperplasia With Atypia|Grade 1 Endometrial Endometrioid Adenocarcinoma	DRUG: Levonorgestrel|DRUG: Metformin	FEMALE	ADULT, OLDER_ADULT	PHASE2	INTERVENTIONAL	Allocation: RANDOMIZED|Intervention Model: PARALLEL|Masking: NONE|Primary Purpose: TREATMENT	2012-12-01	2023-12-01
NCT01750567	A Pilot Study of Metformin Therapy in Patients With Relapsed Chronic Lymphocytic Leukemia (CLL) and Untreated CLL	ACTIVE_NOT_RECRUITING	Metformin is an antidiabetic drug which is an inexpensive and generally well tolerated medication. More recently metformin has been shown to act against carcinomas by two mechanisms: 1) an indirect, insulin-dependent mechanism which sensitizes tissues to insulin, inhibits hepatic gluconeogenesis, and stimulates uptake of glucose in muscle, thereby reducing fasting blood glucose and circulating le…	Relapsed Chronic Lymphocytic Leukemia	DRUG: Metformin	ALL	ADULT, OLDER_ADULT	PHASE2	INTERVENTIONAL	Allocation: NA|Intervention Model: SINGLE_GROUP|Masking: NONE|Primary Purpose: TREATMENT	2012-11-01	2024-05-01
NCT01941953	Metformin and 5-fluorouracil for Refractory Colorectal Cancer.	COMPLETED	This is a phase II trial to evaluate efficacy and safety of Metformin and Fluorouracil in patients with metastatic colorectal cancer (CRC) who have progressed after Oxaliplatin and Irinotecan based chemotherapy.	Metastatic Colorectal Cancer	DRUG: Metformin and Fluorouracil	ALL	CHILD, ADULT, OLDER_ADULT	PHASE2	INTERVENTIONAL	Allocation: NA|Intervention Model: SINGLE_GROUP|Masking: NONE|Primary Purpose: TREATMENT	2012-11-01	2015-03-01
NCT01638676	A Phase I/II Trial of Vemurafenib and Metformin to Melanoma Patients	RECRUITING	The main purpose of this study is to evaluate the safety of Vemurafenib in combination with Metformin in melanoma patients. The phase II part of the study will also evaluate the clinical activity of the combined regiment. Based on pre-clinical studies and a phase I trial, the investigators hypothesize that the combination of an FDA-approved non-toxic dose of oral Metformin with Vemurafenib will y…	Melanoma	DRUG: Vemurafenib|DRUG: Metformin	ALL	ADULT, OLDER_ADULT	PHASE1|PHASE2	INTERVENTIONAL	Allocation: NA|Intervention Model: SINGLE_GROUP|Masking: NONE|Primary Purpose: TREATMENT	2012-07-01	2027-06-01
NCT01319994	Prevention of Metabolic Complications of Glucocorticoid Excess	COMPLETED	According to current estimates, nearly 1% of the general population is treated with long-term glucocorticoids. Chronic hypercortisolism leads to a phenotype that resembles the metabolic syndrome. The investigators have shown that inhibition of adenosine-monophosphate-activated protein kinase (AMPK) activity in adipose tissue plays a role in corticosteroid-mediated insulin resistance. Metformin, o…	Iatrogenic Cushing Disease	DRUG: Metformin|DRUG: Placebo	ALL	ADULT, OLDER_ADULT	PHASE2|PHASE3	INTERVENTIONAL	Allocation: RANDOMIZED|Intervention Model: PARALLEL|Masking: TRIPLE (PARTICIPANT, CARE_PROVIDER, INVESTIGATOR)|Primary Purpose: TREATMENT	2012-07-01	2015-01-01
NCT01447927	Metformin Hydrochloride in Preventing Esophageal Cancer in Patients With Barrett Esophagus	COMPLETED	This randomized phase II trial studies how well metformin hydrochloride works in preventing esophageal cancer in patients with Barrett esophagus. Chemoprevention is the use of certain drugs to keep cancer from forming. The use of metformin hydrochloride may keep esophageal cancer from forming.	Barrett Esophagus|Esophageal Cancer	DRUG: metformin hydrochloride|OTHER: placebo	ALL	ADULT, OLDER_ADULT	PHASE2	INTERVENTIONAL	Allocation: RANDOMIZED|Intervention Model: PARALLEL|Masking: DOUBLE (PARTICIPANT, INVESTIGATOR)|Primary Purpose: PREVENTION	2012-06-01	2013-09-01
NCT01589367	Neoadjuvant Letrozole Plus Metformin vs Letrozole Plus Placebo for ER-positive Postmenopausal Breast Cancer	COMPLETED	Preoperative letrozole versus letrozole with metformin in postmenopausal Estrogen receptor positive breast cancer patients Phase II multicenter 1:1 randomized clinical trial Total 208 patients Primary endpoint Clinical response rate Secondary endpoint Pathologic complete response rate Breast conserving surgery rate Percent mammographic density change Ki67(%) change after 4week medication of 2nd c…	Hormone Receptor Positive Malignant Neoplasm of Breast	DRUG: Metformin|DRUG: Placebo	FEMALE	ADULT, OLDER_ADULT	PHASE2	INTERVENTIONAL	Allocation: RANDOMIZED|Intervention Model: PARALLEL|Masking: QUADRUPLE (PARTICIPANT, CARE_PROVIDER, INVESTIGATOR, OUTCOMES_ASSESSOR)|Primary Purpose: TREATMENT	2012-05-01	2018-08-01
NCT01488552	Gemcitabine+Nab-paclitaxel and FOLFIRINOX and Molecular Profiling for Patients With Advanced Pancreatic Cancer	COMPLETED	The Investigators in the PCRT team have developed a therapeutic regimen which attacks both the tumor compartment and the stromal compartment of pancreatic cancer and induces complete responses in a small percentage of patients with advanced stage IV pancreatic cancer.	Stage IV Pancreatic Cancer	DRUG: Gemcitabine|DRUG: nab-paclitaxel|DRUG: FOLFIRINOX|GENETIC: Immunohistochemistry (IHC) Analysis|DRUG: Metformin|DRUG: mFOLFIRI	ALL	ADULT, OLDER_ADULT	PHASE1|PHASE2	INTERVENTIONAL	Allocation: NA|Intervention Model: SINGLE_GROUP|Masking: NONE|Primary Purpose: TREATMENT	2011-11-01	2016-08-01
NCT01433913	Metformin Hydrochloride in Treating Patients With Prostate Cancer Undergoing Surgery	COMPLETED	This randomized phase II trial studies how well metformin hydrochloride works compared to placebo in treating patients with prostate cancer undergoing surgery. Metformin hydrochloride may make some enzymes active. These enzymes may block other enzymes needed for cell growth and stop the growth of tumor cells.	Adenocarcinoma of the Prostate|Recurrent Prostate Cancer|Stage I Prostate Cancer|Stage IIA Prostate Cancer|Stage IIB Prostate Cancer	DRUG: metformin hydrochloride|OTHER: placebo|OTHER: laboratory biomarker analysis	MALE	ADULT, OLDER_ADULT	PHASE2	INTERVENTIONAL	Allocation: RANDOMIZED|Intervention Model: PARALLEL|Masking: DOUBLE (PARTICIPANT, INVESTIGATOR)|Primary Purpose: TREATMENT	2011-11-01	2014-04-01
NCT03086005	Study to Assess the Effect of Metformin Supplementation on IVF Outcome in Patients With Polycystic Ovarian Syndrome.	COMPLETED	This study was performed to investigate the effects of metformin on controlled ovarian stimulation (COS), in vitro fertilization (IVF) outcomes, pregnancy outcomes, and comparison of serum and follicular fluid cytokines and hormones in patients with polycystic ovary syndrome (PCOS) undergoing IVF using gonadotropin-releasing hormone(GnRH) antagonist protocol.	Polycystic Ovary Syndrome	DRUG: Metformin	FEMALE	ADULT	PHASE3	INTERVENTIONAL	Allocation: RANDOMIZED|Intervention Model: PARALLEL|Masking: DOUBLE (PARTICIPANT, INVESTIGATOR)|Primary Purpose: TREATMENT	2011-10-12	2015-07-23
NCT01579812	Evaluation of Metformin, Targeting Cancer Stem Cells for Prevention of Relapse in Gynecologic Patients	COMPLETED	The primary objective of this study is to determine if metformin administered in combination with chemotherapy to women with advanced ovarian, primary peritoneal or fallopian tube cancer will improve recurrence-free survival at 18 months compared to controls.	Ovarian, Fallopian Tube, and Primary Peritoneal Cancer	DRUG: Metformin	FEMALE	ADULT, OLDER_ADULT	PHASE2	INTERVENTIONAL	Allocation: NA|Intervention Model: SINGLE_GROUP|Masking: NONE|Primary Purpose: TREATMENT	2011-10-01	2017-07-01
NCT01840007	Pilot Study Evaluating the Efficacy and Safety of Metformin in Melanoma	COMPLETED	In western countries, melanoma represents a major mistake of public health by its frequency, lethality and the increasing of incidence. Surgery can cure melanoma diagnosed very early. In other cases, it exists a risk of recurrence of lymph node and visceral. At the stage of visceral metastases, the prognosis of melanoma is catastrophic, with a median survival of 6 months. Indeed, the reference ch…	Metastatic Melanoma (Stage IIIC Non-rÃ©sÃ©cable or no Surgically Curable or Stage IV With Classification AJCC)	DRUG: Metformin Group	ALL	ADULT, OLDER_ADULT	PHASE2	INTERVENTIONAL	Allocation: NA|Intervention Model: SINGLE_GROUP|Masking: NONE|Primary Purpose: TREATMENT	2011-08-30	2015-11-18
NCT01310231	A Trial of Standard Chemotherapy With Metformin (vs Placebo) in Women With Metastatic Breast Cancer	COMPLETED	The purpose of this study is to determine if the addition of metformin to standard chemotherapy improves progression free survival in women with metastatic breast cancer.	Metastatic Breast Cancer	DRUG: Metformin|DRUG: Placebo	FEMALE	ADULT, OLDER_ADULT	PHASE2	INTERVENTIONAL	Allocation: RANDOMIZED|Intervention Model: PARALLEL|Masking: QUADRUPLE (PARTICIPANT, CARE_PROVIDER, INVESTIGATOR, OUTCOMES_ASSESSOR)|Primary Purpose: TREATMENT	2011-08-22	2018-03-26
NCT01971034	Treatment of Patients With Advanced Pancreatic Cancer After Gemcitabine Failure.	COMPLETED	In Brazil pancreatic adenocarcinoma represents 2% of tumors, and 4% mortality being an uncommon disease, however very aggressive.Only 20% of cases are indicated for curative surgery, of which only 20% are alive within 5 years. For locally, advanced or metastatic disease, since 1997, single chemotherapy with gemcitabine is the standard treatment for first line, with survival around 6 months approx…	Pancreatic Adenocarcinoma Advanced or Metastatic	DRUG: Paclitaxel|DRUG: Metformin	ALL	ADULT, OLDER_ADULT	PHASE2	INTERVENTIONAL	Allocation: NA|Intervention Model: SINGLE_GROUP|Masking: NONE|Primary Purpose: TREATMENT	2011-06-01
NCT01340300	Exercise and Metformin in Colorectal and Breast Cancer Survivors	COMPLETED	Metformin is a medication that is commonly used in the treatment of diabetes. Recently small studies in cancer patients without diabetes suggest that metformin may benefit in lowering insulin levels. In those studies of patients with cancer but not diabetes, glucose (or sugar) levels in the blood are generally no lowered. Insulin and insulin-like growth factors affect the growth of cancer cells. …	Colorectal Cancer|Breast Cancer	BEHAVIORAL: Exercise training|DRUG: Metformin|OTHER: Educational information	ALL	ADULT, OLDER_ADULT	PHASE2	INTERVENTIONAL	Allocation: RANDOMIZED|Intervention Model: PARALLEL|Masking: NONE|Primary Purpose: DIAGNOSTIC	2011-05-01	2017-12-01
NCT01266486	Effect of Metformin on Breast Cancer Metabolism	COMPLETED	Metformin, a drug that has been used since the 1950's in the treatment of diabetes, has recently generated great interest in its anticancer effects based on in vitro, in vivo and clinical studies. This study assesses the pharmacodynamic effects of metformin on breast cancer metabolism. The trial design is based on a 2 centre study 'Early Antiangiogenic Response to Bevacizumab in Primary Breast Ca…	Breast Cancer	DRUG: Metformin	ALL	ADULT, OLDER_ADULT	PHASE2	INTERVENTIONAL	Allocation: NA|Intervention Model: SINGLE_GROUP|Masking: NONE|Primary Purpose: BASIC_SCIENCE	2011-05-01	2014-05-01
NCT01620593	Castration Compared to Castration Plus Metformin as First Line Treatment for Patients With Advanced Prostate Cancer	COMPLETED	Prostate cancer is the most common non-cutaneous cancer in men. Patients with recurrent or metastatic prostate cancer are treated with androgen-deprivation therapy, often termed castration therapy. While the short and medium term benefits of castration are clear in relation to therapeutic efficacy in patients with prostate cancer, it is now appreciated that the resulting hypogonadism associated w…	Prostate Cancer	DRUG: Placebo|DRUG: Metformin	MALE	ADULT, OLDER_ADULT	PHASE2	INTERVENTIONAL	Allocation: RANDOMIZED|Intervention Model: PARALLEL|Masking: QUADRUPLE (PARTICIPANT, CARE_PROVIDER, INVESTIGATOR, OUTCOMES_ASSESSOR)|Primary Purpose: TREATMENT	2011-04-01	2016-09-01
NCT01312467	Trial of Metformin for Colorectal Cancer Risk Reduction for History of Colorectal Adenomas and Elevated BMI	COMPLETED	The purpose of this study is to find out whether METFORMIN decreases protein markers in colorectal tissue. This is a phase IIA study of the pharmacodynamics, safety and tolerability of Metformin in decreasing colorectal mucosa in patients with a history of colorectal adenomas in the past 3 years and a BMI \>= 30, with decimals rounded to the nearest whole integer. Metformin as a potential chemopr…	Adenomatous Polyp|Colorectal Cancer|Obesity	DRUG: metformin hydrochloride	ALL	ADULT, OLDER_ADULT	PHASE2	INTERVENTIONAL	Allocation: NA|Intervention Model: SINGLE_GROUP|Masking: NONE|Primary Purpose: PREVENTION	2011-03-01	2014-12-01
NCT01243385	Metformin Hydrochloride as First-Line Therapy in Treating Patients With Locally Advanced or Metastatic Prostate Cancer	COMPLETED	RATIONALE: Metformin hydrochloride may make some enzymes active. These enzymes may block other enzymes needed for cell growth and stop the growth of tumor cells. PURPOSE: This phase II trial is studying the safety of giving metformin hydrochloride as first-line therapy in treating patients with locally advanced or metastatic prostate cancer.	Prostate Cancer	DRUG: Metformin	MALE	ADULT, OLDER_ADULT	PHASE2	INTERVENTIONAL	Allocation: NA|Intervention Model: SINGLE_GROUP|Masking: NONE|Primary Purpose: TREATMENT	2010-12-23	2019-08-09
NCT01885013	Myocet + Cyclophosphamide + Metformin Vs Myocet + Cyclophosphamide in 1st Line Treatment of HER2 Neg. Metastatic Breast Cancer Patients	COMPLETED	This is a phase II comparative randomized clinical trial. Eligible patients will be randomized (1:1) to: Arm A: Myocet plus Cyclofosfamide plus Metformin Arm B: Myocet plus Cyclofosfamide Statistical Considerations: In this randomized phase II study, the sample size was calculated basing on the primary end-point (PFS) and assuming an error Î± = 10% (2-tailed) with a power of 80%. To find an advan…	Human Epidermal Growth Factor 2 Negative Carcinoma of Breast	DRUG: Metformin + Myocet + Cyclophosphamide|DRUG: Myocet + Cyclophosphamide	FEMALE	ADULT, OLDER_ADULT	PHASE2	INTERVENTIONAL	Allocation: RANDOMIZED|Intervention Model: PARALLEL|Masking: NONE|Primary Purpose: TREATMENT	2010-09-01	2015-05-01
NCT01101438	A Phase III Randomized Trial of Metformin vs Placebo in Early Stage Breast Cancer	COMPLETED	This study is looking at whether Metformin, an agent that is commonly used to treat diabetes, can decrease or affect the ability of breast cancer cells to grow and whether Metformin will work with other therapies to keep cancer from recurring. Health Canada has not approved the sale or use of Metformin to treat breast cancer, although they have approved its use in this clinical trial. Although Me…	Breast Cancer	DRUG: metformin hydrochloride|OTHER: placebo	ALL	ADULT, OLDER_ADULT	PHASE3	INTERVENTIONAL	Allocation: RANDOMIZED|Intervention Model: PARALLEL|Masking: TRIPLE (PARTICIPANT, INVESTIGATOR, OUTCOMES_ASSESSOR)|Primary Purpose: TREATMENT	2010-08-13	2023-08-18
NCT01210911	Metformin Combined With Chemotherapy for Pancreatic Cancer	COMPLETED	Pancreatic cancer patients have one of the worst prognoses among all cancer types with a 5 year survival rate of less than 5%. Despite significant changes during the last decade in our molecular knowledge on this disease, the prognosis and management of pancreatic cancer have remained unchanged. With the advances in molecular biology, newer biologic agents such as erlotinib, are adding some benef…	Locally Advanced Pancreatic Cancer|Metastatic Pancreatic Cancer	DRUG: gemcitabine|DRUG: erlotinib|DRUG: metformin|DRUG: placebo	ALL	ADULT, OLDER_ADULT	PHASE2	INTERVENTIONAL	Allocation: RANDOMIZED|Intervention Model: PARALLEL|Masking: QUADRUPLE (PARTICIPANT, CARE_PROVIDER, INVESTIGATOR, OUTCOMES_ASSESSOR)|Primary Purpose: TREATMENT	2010-08-01	2014-04-01
NCT01042379	I-SPY TRIAL: Neoadjuvant and Personalized Adaptive Novel Agents to Treat Breast Cancer	RECRUITING	The purpose of this study is to further advance the ability to practice personalized medicine by learning which new drug agents are most effective with which types of breast cancer tumors and by learning more about which early indicators of response (tumor analysis prior to surgery via magnetic resonance imaging (MRI) images along with tissue and blood samples) are predictors of treatment success.	Breast Neoplasms|Breast Cancer|Breast Tumors|Angiosarcoma|TNBC - Triple-Negative Breast Cancer|HER2-positive Breast Cancer|HER2-negative Breast Cancer|Hormone Receptor Positive Tumor|Hormone Receptor Negative Tumor|Early-stage Breast Cancer|Locally Advanced Breast Cancer	DRUG: Standard Therapy|DRUG: AMG 386 with or without Trastuzumab|DRUG: AMG 479 (Ganitumab) plus Metformin|DRUG: MK-2206 with or without Trastuzumab|DRUG: AMG 386 and Trastuzumab|DRUG: T-DM1 and Pertuzumab|DRUG: Pertuzumab and Trastuzumab|DRUG: Ganetespib|DRUG: ABT-888|DRUG: Neratinib|DRUG: PLX3397|DRUG: Pembrolizumab - 4 cycle|DRUG: Talazoparib plus Irinotecan|DRUG: Patritumab and Trastuzumab|DRU…	ALL	ADULT, OLDER_ADULT	PHASE2	INTERVENTIONAL	Allocation: RANDOMIZED|Intervention Model: PARALLEL|Masking: NONE|Primary Purpose: TREATMENT	2010-03-01	1931-12-01
NCT00930579	Pre-Surgical Study: Effect of Metformin on Breast Cancer Proliferation	COMPLETED	The purpose of this pilot study is to use a pre surgical intervention model to evaluate the biologic effects of metformin in women with newly diagnosed early invasive breast cancer. Metformin is a drug commonly used to treat patients with diabetes. This model will be used to evaluate the effects of metformin.	Breast Cancer	DRUG: Metformin	FEMALE	ADULT, OLDER_ADULT	PHASE2	INTERVENTIONAL	Allocation: NA|Intervention Model: SINGLE_GROUP|Masking: NONE|Primary Purpose: TREATMENT	2009-10-16	2017-01-09
NCT00909506	Efficacy and Safety of Adjuvant Metformin for Operable Breast Cancer Patients	COMPLETED	The investigators hypothesize that adjuvant metformin use in breast cancer patients with overweight or pre-diabetes mellitus (DM) may improve their body condition including weight loss. In this study, the investigators aim to test the efficacy and safety of adjuvant metformin for operable breast cancer patients with overweight or pre-DM.	Breast Cancer	DRUG: Placebo|DRUG: Metformin|DRUG: Metformin	FEMALE	ADULT, OLDER_ADULT	PHASE2	INTERVENTIONAL	Allocation: RANDOMIZED|Intervention Model: PARALLEL|Masking: DOUBLE (PARTICIPANT, INVESTIGATOR)|Primary Purpose: PREVENTION	2009-06-01	2011-12-01
NCT01581814	Effects of Drospirenone-ethinylestradiol and/or Metformin on Cardiovascular Risk in Hyperinsulinemic Women With Polycystic Ovary Syndrome	COMPLETED	To evaluate long-term effects of drospirenone (DRSP)/ethinylestradiol (EE) alone, metformin alone and DRSP/EE plus metformin on some cardiovascular risk factors in hyperinsulinemic PCOS patients	Polycystic Ovary Syndrome	DRUG: Metformin|DRUG: Yasmin;|DRUG: Metformin plus Yasmin	FEMALE	ADULT	PHASE3	INTERVENTIONAL	Allocation: RANDOMIZED|Intervention Model: PARALLEL|Masking: TRIPLE (PARTICIPANT, CARE_PROVIDER, INVESTIGATOR)|Primary Purpose: TREATMENT	2008-10-01	2012-03-01
NCT00466622	Uterine Artery Blood Flow in Pregnant Women With PCOS Treated With Metformin	COMPLETED	FlowMet study is a "sub-study" of the PregMet study (registered in 2005). The aim of the FlowMet study is to register the possible effect of metformin on the blood flow of the uterine artery in pregnant PCOS women. The participants will be examined with ultrasound Doppler in gestational week 10-13: 1. before and 3h after the first tablet intake of metformin/placebo 2. and 10-14 days after inclusi…	Polycystic Ovary Syndrome	DRUG: Metformin|DRUG: Placebo	FEMALE	ADULT	PHASE3	INTERVENTIONAL	Allocation: RANDOMIZED|Intervention Model: PARALLEL|Masking: QUADRUPLE (PARTICIPANT, CARE_PROVIDER, INVESTIGATOR, OUTCOMES_ASSESSOR)|Primary Purpose: PREVENTION	2007-04-01	2010-02-01
NCT00948402	PED/PEA-15 Protein, PCOS, Obesity, Insulin Sensitivity Indexes, Metformin, Oral Contraceptives	COMPLETED	Insulin-resistance plays an important role in polycystic ovary syndrome (PCOS) physiopathology. The phosphoprotein enriched in the diabetes (PED/PEA-15), a 15 kDa protein related to insulin sensitivity, is over-expressed in type 2 diabetic patients and in PCOS women, independently of obesity. The effectiveness of oral contraceptives pills (OCP) or metformin (MET) in PCOS management is still uncer…	Polycystic Ovarian Syndrome|Insulin Sensitivity	DRUG: Metformin|DRUG: oral contraceptive	FEMALE	ADULT	PHASE3	INTERVENTIONAL	Allocation: RANDOMIZED|Intervention Model: PARALLEL|Masking: NONE|Primary Purpose: TREATMENT	2006-12-01	2009-01-01
NCT00344851	Exenatide and Metformin Therapy in Overweight Women With PCOS	COMPLETED	Current research has shown that the use of diabetes management practices aimed at reducing insulin resistance and hyperinsulinemia (such as weight reduction and the administration of oral antidiabetic drugs) in women with PCOS can not only improve glucose and lipid metabolism but can also reverse testosterone abnormalities and restore menstrual cycles. A new medicine called exenatide (Byetta) has…	Polycystic Ovary Syndrome	DRUG: metformin, exenatide or combined (metformin & exenatide )	FEMALE	ADULT	PHASE2	INTERVENTIONAL	Allocation: RANDOMIZED|Intervention Model: PARALLEL|Masking: NONE|Primary Purpose: TREATMENT	2006-06-01	2007-06-01
NCT00892073	Hypothalamic Obesity Following Craniopharyngioma Surgery: A Pilot Trial of Combined Metformin and Diazoxide Therapy	COMPLETED	To study the effect of combined diazoxide-metformin therapy on body weight in youth with hypothalamic obesity following treatment for craniopharyngioma. A secondary objective is to evaluate changes in insulin resistance (IR), beta-cell function, features of the metabolic syndrome, muscle metabolism and intramyocellular lipid. Hypothesis: Treatment with diazoxide and metformin will result in weigh…	Hypothalamic Obesity	DRUG: Diazoxide|DRUG: Metformin	ALL	CHILD, ADULT	PHASE2	INTERVENTIONAL	Allocation: NA|Intervention Model: SINGLE_GROUP|Masking: NONE|Primary Purpose: TREATMENT	2006-05-01	2008-01-01
NCT00283816	Impact of Metformin in Teens With Polycystic Ovary Syndrome (PCOS) on Oral Contraceptive Therapy	COMPLETED	Oral contraceptives are known to improve menstrual cycles and symptoms in PCOS, however may increase cholesterol. Metformin, a drug to improve insulin resistance, may benefit metabolic state. This study is to determine whether metformin added to oral contraceptive therapy in adolescent women with PCOS improves metabolic state.The study will also test a lifestyle improvement program to reduce weig…	Polycystic Ovary Syndrome	DRUG: Metformin|DRUG: Oral Contraceptive Pill|BEHAVIORAL: Lifestyle Management Program|BEHAVIORAL: Quality of Life Questionnaire|PROCEDURE: Oral Glucose Tolerance Test|PROCEDURE: Blood work|PROCEDURE: Abdominal Ultra Sound|PROCEDURE: Dual-energy x-ray absorptiometry (DEXA scan)|DRUG: placebo	FEMALE	CHILD, ADULT	PHASE3	INTERVENTIONAL	Allocation: RANDOMIZED|Intervention Model: PARALLEL|Masking: DOUBLE (PARTICIPANT, INVESTIGATOR)|Primary Purpose: TREATMENT	2006-01-01	2008-01-01
NCT00268476	Systemic Therapy in Advancing or Metastatic Prostate Cancer: Evaluation of Drug Efficacy	ACTIVE_NOT_RECRUITING	The overall aim of this trial, which is called STAMPEDE, is to assess novel approaches for the treatment of men with prostate cancer who are starting long-term ADT for the first time, termed hormone-naÃ¯ve prostate cancer. This trial aims to see if we can improve the way in which prostate cancer is currently managed, either by adding new treatments to the standard approach or by modifying the typ…	Prostate Cancer	DRUG: Celecoxib|DRUG: Docetaxel|DRUG: Prednisolone|DRUG: ADT|DRUG: Zoledronic Acid|DRUG: Abiraterone|RADIATION: Radiotherapy to the prostate|DRUG: Enzalutamide|DRUG: Metformin|DRUG: Transdermal Oestradiol	MALE	CHILD, ADULT, OLDER_ADULT	PHASE2|PHASE3	INTERVENTIONAL	Allocation: RANDOMIZED|Intervention Model: PARALLEL|Masking: NONE|Primary Purpose: TREATMENT	2005-07-08	1930-12-01
NCT00159536	Metformin in Pregnant PCOS Women	COMPLETED	To investigate the effect of metformin on pregnancy complications and pregnancy outcome in the II. and III. trimester of pregnancy in women with polycystic ovary syndrome.	Polycystic Ovary Syndrome	DRUG: Metformin|DRUG: Placebo	FEMALE	ADULT	PHASE3	INTERVENTIONAL	Allocation: RANDOMIZED|Intervention Model: PARALLEL|Masking: QUADRUPLE (PARTICIPANT, CARE_PROVIDER, INVESTIGATOR, OUTCOMES_ASSESSOR)|Primary Purpose: PREVENTION	2005-02-01	2009-10-01
NCT00151411	Lifestyle Intervention and Metformin for Women With Polycystic Ovary Syndrome (PCOS)	COMPLETED	The purpose of this study is to determine if the combination therapy of lifestyle intervention and use of Metformin together will improve ovulation induction and hyperandrogenemia in women with polycystic ovary syndrome, by gathering data from adult and adolescent females.	Polycystic Ovary Syndrome	DRUG: Metformin|DRUG: Placebo|BEHAVIORAL: Lifestyle Intervention	FEMALE	CHILD, ADULT	PHASE2	INTERVENTIONAL	Allocation: RANDOMIZED|Intervention Model: PARALLEL|Masking: TRIPLE (PARTICIPANT, CARE_PROVIDER, INVESTIGATOR)|Primary Purpose: TREATMENT	2004-10-01	2008-03-01
NCT00068861	Treatment of Infertility in Women With Polycystic Ovary Syndrome	COMPLETED	Polycystic Ovary Syndrome (PCOS) is a common endocrine disorder affecting up to 10% of women. The primary symptoms of PCOS are menstrual irregularities, increased body and facial hair, acne, and infertility. This study will test a combination of medications in women with PCOS to determine which works best to overcome infertility.	Polycystic Ovary Syndrome|Infertility|Pregnancy	DRUG: metformin XR|DRUG: clomiphene citrate	FEMALE	ADULT	PHASE3	INTERVENTIONAL	Allocation: RANDOMIZED|Intervention Model: FACTORIAL|Masking: DOUBLE|Primary Purpose: TREATMENT	2002-11-01	2006-02-01
NCT00038727	Diabetes Prevention Program Outcomes Study	ACTIVE_NOT_RECRUITING	The Diabetes Prevention Program (DPP) was a multi-center trial examining the ability of an intensive lifestyle or metformin to prevent or delay the development of diabetes in a high risk population due to the presence of impaired glucose tolerance (IGT, 2 hour glucose of 140-199 mg/dl). The DPP has ended early demonstrating that lifestyle reduced diabetes onset by 58% and metformin reduced diabet…	Diabetes Mellitus|Cancer|CVD	BEHAVIORAL: DPPOS Group Lifestyle|DRUG: Metformin|BEHAVIORAL: DPPOS Boost Lifestyle|BEHAVIORAL: Intensive Lifestyle Group Session	ALL	ADULT, OLDER_ADULT	PHASE3	INTERVENTIONAL	Allocation: RANDOMIZED|Intervention Model: PARALLEL|Masking: NONE|Primary Purpose: PREVENTION	2002-09-01	2025-01-01
NCT00994812	The Effects of Metformin on Pregnancy and Miscarriage Rates in Polycystic Ovary Syndrome (PCOS)	COMPLETED	The purpose of this study is to determine whether metformin may improve pregnancy rates, and decrease miscarriage rates and complications of pregnancy, such as toxemia and gestational diabetes, in women with polycystic ovary syndrome (PCOS).	Polycystic Ovary Syndrome|Miscarriage|Infertility|Toxemia|Gestational Diabetes	DRUG: metformin	FEMALE	ADULT	PHASE3	INTERVENTIONAL	Allocation: RANDOMIZED|Intervention Model: PARALLEL|Masking: QUADRUPLE (PARTICIPANT, CARE_PROVIDER, INVESTIGATOR, OUTCOMES_ASSESSOR)|Primary Purpose: TREATMENT	2002-08-01	2009-12-01
NCT00714233	Treatment of Adolescent Polycystic Ovary Syndrome (PCOS)	COMPLETED	A 24 week study to compare the use of Metformin, birth control pills and a carefully planned intensive lifestyle program that includes weight loss and exercise. These approaches will be compared to placebo (a pill that contains no active substances. Metformin, birth control pills and the lifestyle management program will be used on this research study to compare their ability to: 1. reduce fastin…	Polycystic Ovary Syndrome	DRUG: Metformin|DRUG: Oral Contraceptive Pills (Yasmin)|BEHAVIORAL: Lifestyle Modification|DRUG: placebo	FEMALE	CHILD, ADULT	PHASE3	INTERVENTIONAL	Allocation: RANDOMIZED|Intervention Model: PARALLEL|Masking: TRIPLE (PARTICIPANT, CARE_PROVIDER, INVESTIGATOR)|Primary Purpose: TREATMENT	2002-08-01	2007-12-01
NCT03259919	Metformin Treatment of Pregnant Women With Polycystic Ovary Syndrome: a Pilot Study	COMPLETED	To investigate the effect of metformin on pregnancy complications and pregnancy outcome in the II. and III. trimester of pregnancy in women with polycystic ovary syndrome.	Polycystic Ovary Syndrome	DRUG: Metformin|DRUG: Placebo	FEMALE	ADULT	PHASE2	INTERVENTIONAL	Allocation: RANDOMIZED|Intervention Model: PARALLEL|Masking: QUADRUPLE (PARTICIPANT, CARE_PROVIDER, INVESTIGATOR, OUTCOMES_ASSESSOR)|Primary Purpose: PREVENTION	2000-10-01	2003-03-01
NCT00413179	The Effect of Metformin Added to Clomiphene Citrate on Pregnancy Rates in Hyperandrogenic, Chronic Oligoovulatory or Anovulatory Women	COMPLETED	The purpose of our study was to conduct a placebo controlled, double-blind randomized trial in chronic oligoovulatory or anovulatory , hyperandrogenic, infertility patients comparing the effects of adjuvant metformin plus clomiphene citrate to clomiphene citrate plus placebo on pregnancy rates and ovulation rates. We hypothesized that combining metformin with clomiphene citrate would result in hi…	Polycystic Ovary Syndrome|Anovulation|Oligoovulation|Infertility|Hyperandrogenism	DRUG: Metformin|DRUG: Clomiphene citrate|DRUG: Placebo	FEMALE	ADULT	PHASE3	INTERVENTIONAL	Allocation: RANDOMIZED|Intervention Model: PARALLEL|Masking: DOUBLE|Primary Purpose: TREATMENT	1997-12-01	2003-04-01
Supplementary Table 1: Summary of 131 Interventional Clinical Trials Investigating the Impact of Metformin on Various Types of Cancer. Data was retrieved from clinicaltrials.gov on November 23, 2023. The table provides information on both completed and ongoing studies that have reached Phase 2 or Phase 3. Trials withdrawn, suspended, or terminated have been excluded from the list. Dates have been…
